# Supplementary material for: Asymmetric Divergence in Transmitted SNPs of DNA Replication/Transcription and Their Impact on Gene Expression in Polyploid Brassica napus
Source: Front Genet. 2021 Nov 11;12:756172. doi: 10.3389/fgene.2021.756172 (PMC8636028; doi:10.3389/fgene.2021.756172)
Supplement: Supplementary file 1 [file DataSheet1.xlsx]

## Sheet: Supplementary Table 1
Supplementary table 1.Whole genome distribution of SNP number and density in DNA/RNA of ZY821 and ZS11
Chromosome	Length	SNP number in ZY821-DNA	SNP density in ZY821-DNA(SNP/kb)	SNP number in ZS11-DNA	SNP density in ZS11-DNA(SNP/kb)	SNP number in ZY821-RNA	SNP density in ZY821-RNA(SNP/kb)	SNP number in ZS111-RNA	SNP density in ZS111-RNA(SNP/kb)
A01	23267856	41445	1.78121	52907	2.27382	37414	1.60797	30458	1.30902
A01_random	2687285	4306	1.60236	5409	2.01281	2807	1.04455	1877	0.698474
A02	24793737	40108	1.61767	75908	3.06158	34612	1.396	34321	1.38426
A02_random	1623597	2831	1.74366	5320	3.27668	2462	1.51639	2432	1.49791
A03	29767490	58739	1.97326	81910	2.75166	63925	2.14748	56412	1.89509
A03_random	6015112	6693	1.1127	9715	1.6151	4805	0.798821	4495	0.747285
A04	19151660	42496	2.21892	64174	3.35083	27537	1.43784	25544	1.33377
A04_random	1481564	2587	1.74613	4254	2.87129	2215	1.49504	2009	1.356
A05	23067598	46163	2.00121	61561	2.66872	41268	1.789	30111	1.30534
A05_random	3017581	5274	1.74776	9820	3.25426	3268	1.08299	2855	0.946122
A06	24396386	53554	2.19516	77916	3.19375	36216	1.48448	34971	1.43345
A06_random	2286780	5504	2.40688	8166	3.57096	3365	1.4715	3319	1.45139
A07	24006521	47404	1.97463	62339	2.59675	40125	1.67142	31261	1.30219
A07_random	2069713	4873	2.35443	6630	3.20334	4007	1.93602	2662	1.28617
A08	18961941	36832	1.94242	50149	2.64472	24767	1.30614	25773	1.3592
A08_random	2120946	4146	1.95479	5800	2.73463	1806	0.851507	1828	0.86188
A09	33865340	50587	1.49377	69857	2.06279	53704	1.58581	34464	1.01768
A09_random	4134372	6153	1.48826	8957	2.16647	5781	1.39828	4564	1.10392
A10	17398227	36507	2.09832	50435	2.89886	25888	1.48797	24542	1.4106
A10_random	2278402	5724	2.51229	8432	3.70084	1919	0.842257	1797	0.788711
Ann_random	48658326	63641	1.30792	92841	1.90802	31097	0.639089	26441	0.543401
C01	38829317	75405	1.94196	108391	2.79147	29504	0.759838	25579	0.658755
C01_random	4437620	10937	2.46461	15726	3.54379	2749	0.619476	2693	0.606857
C02	46221804	51474	1.11363	74175	1.60476	30527	0.660446	27180	0.588034
C02_random	5147596	9258	1.79851	10304	2.00171	3243	0.630003	3129	0.607857
C03	60573394	83179	1.37319	122585	2.02374	53016	0.875236	49257	0.813179
C03_random	6509817	10268	1.57731	15480	2.37795	5397	0.829056	5046	0.775137
C04	48930237	46215	0.944508	110972	2.26796	31281	0.639298	28582	0.584138
C04_random	4434705	4882	1.10086	8644	1.94917	3368	0.759464	2980	0.671973
C05	43185227	36648	0.848624	50514	1.16971	27562	0.638228	20997	0.486208
C05_random	3728275	4028	1.08039	5432	1.45697	1478	0.39643	1313	0.352174
C06	37225952	49876	1.33982	72752	1.95434	24747	0.664778	24846	0.667438
C06_random	3366307	6174	1.83406	9029	2.68217	1642	0.487775	1911	0.567684
C07	44770477	42332	0.945534	95849	2.1409	27965	0.62463	24637	0.550296
C07_random	2949052	3416	1.15834	7315	2.48046	2292	0.777199	1822	0.617826
C08	38477087	46431	1.20672	77408	2.01179	26710	0.694179	23511	0.611039
C08_random	4518928	6115	1.3532	11101	2.45656	1774	0.392571	1769	0.391465
C09	48508220	42839	0.883129	62216	1.28259	31736	0.65424	23425	0.482908
C09_random	4437882	5115	1.15258	7630	1.71929	2540	0.572345	2126	0.479057
Cnn_random	80671874	68563	0.8499	130265	1.61475	34165	0.423506	32384	0.401429
Unn_random	8317898	9804	1.17866	14919	1.7936	1505	0.180935	1535	0.184542
An	315050434	565567	1.79516	812500	2.57895	448988	1.42513	382136	1.21294
Cn	526923771	603155	1.14467	995788	1.88981	341696	0.648473	303187	0.575391
Total	850292103	1178526	1.38602	1823207	2.14421	792189	0.931667	686858	0.807791

## Sheet: Supplementary Table 2
Supplementary table 2. Annotated genomic/transcriptional SNPs in ZY821 and ZS11
## Genomic pattern
Type (alphabetical order)	Count in ZY821-DNA	Percent of ZY821-DNA	Count in ZS11-DNA	Percent of ZS11-DNA
DOWNSTREAM	182548	0.11877	266642	0.11326
EXON	162124	0.10549	228122	0.0969
INTERGENIC	846691	0.5509	1352662	0.57457
INTRON	139244	0.0906	199500	0.08474
NONE	17265	0.01123	24700	0.01049
SPLICE_SITE_ACCEPTOR	363	0.00024	521	0.00022
SPLICE_SITE_DONOR	334	0.00022	489	0.00021
SPLICE_SITE_REGION	12317	0.00801	16943	0.0072
TRANSCRIPT	140	9e-05	213	9e-05
UPSTREAM	175898	0.11445	264417	0.11232
## Transcriptional pattern
Type (alphabetical order)	Count in ZY821-RNA	Percent of ZY821-RNA	Count in ZS11-RNA	Percent of ZS11-RNA
EXON	536701	0.67749	464923	0.67688
INTERGENIC	46216	0.05834	39419	0.05739
INTRON	144456	0.18235	126513	0.18419
NONE	44828	0.05659	38311	0.05578
SPLICE_SITE_ACCEPTOR	939	0.00119	985	0.00143
SPLICE_SITE_DONOR	1198	0.00151	1125	0.00164
SPLICE_SITE_REGION	17619	0.02224	15399	0.02242
TRANSCRIPT	232	0.00029	183	0.00027

## Sheet: Supplementary Table 3
Supplementary table 3. Gene ontology enrichment analysis of genes without SNPs in ZY821 and ZS11
GO.ID	Term	Annotated	Count	Expected	P-value	Q-value	Aspect	Gene	Origin input
GO:0016021	integral component of membrane	17745	3745	3433	6.8e-18	2.896e-15	C	BnaA01g00240D, BnaA01g02520D, BnaA01g04230D, BnaA01g05030D, BnaA01g05870D, BnaA01g05930D, BnaA01g06400D, BnaA01g06630D, BnaA01g06780D, BnaA01g06990D, BnaA01g07100D, BnaA01g09190D, BnaA01g09200D, BnaA01g09210D, BnaA01g09450D, BnaA01g09720D, BnaA01g09790D, BnaA01g09870D, BnaA01g10020D, BnaA01g10170D, BnaA01g10240D, BnaA01g10310D, BnaA01g10640D, BnaA01g10700D, BnaA01g11210D, BnaA01g11250D, BnaA01g11…
GO:0031224	intrinsic component of membrane	17837	3762	3450.79	8e-18	2.896e-15	C	BnaA01g00240D, BnaA01g02520D, BnaA01g04230D, BnaA01g05030D, BnaA01g05870D, BnaA01g05930D, BnaA01g06400D, BnaA01g06630D, BnaA01g06780D, BnaA01g06990D, BnaA01g07100D, BnaA01g09190D, BnaA01g09200D, BnaA01g09210D, BnaA01g09450D, BnaA01g09720D, BnaA01g09790D, BnaA01g09870D, BnaA01g10020D, BnaA01g10170D, BnaA01g10240D, BnaA01g10310D, BnaA01g10640D, BnaA01g10700D, BnaA01g11210D, BnaA01g11250D, BnaA01g11…
GO:0044425	membrane part	18470	3851	3573.26	1.2e-14	2.896e-12	C	BnaA01g00240D, BnaA01g02520D, BnaA01g04230D, BnaA01g05030D, BnaA01g05870D, BnaA01g05930D, BnaA01g06400D, BnaA01g06630D, BnaA01g06780D, BnaA01g06990D, BnaA01g07100D, BnaA01g09190D, BnaA01g09200D, BnaA01g09210D, BnaA01g09450D, BnaA01g09720D, BnaA01g09790D, BnaA01g09870D, BnaA01g10020D, BnaA01g10170D, BnaA01g10240D, BnaA01g10310D, BnaA01g10640D, BnaA01g10700D, BnaA01g11210D, BnaA01g11250D, BnaA01g11…
GO:0016020	membrane	20602	4157	3985.72	8.6e-07	0.0001557	C	BnaA01g00240D, BnaA01g01890D, BnaA01g02520D, BnaA01g04230D, BnaA01g05030D, BnaA01g05870D, BnaA01g05930D, BnaA01g06400D, BnaA01g06630D, BnaA01g06780D, BnaA01g06940D, BnaA01g06990D, BnaA01g07100D, BnaA01g09190D, BnaA01g09200D, BnaA01g09210D, BnaA01g09450D, BnaA01g09620D, BnaA01g09720D, BnaA01g09790D, BnaA01g09870D, BnaA01g10020D, BnaA01g10160D, BnaA01g10170D, BnaA01g10240D, BnaA01g10310D, BnaA01g10…
GO:0006355	regulation of transcription, DNA-templated	4359	994	809.76	5.5e-14	1.446e-10	P	BnaA01g00290D, BnaA01g00710D, BnaA01g02570D, BnaA01g05150D, BnaA01g06910D, BnaA01g07630D, BnaA01g07650D, BnaA01g08340D, BnaA01g08830D, BnaA01g09660D, BnaA01g09690D, BnaA01g09760D, BnaA01g10110D, BnaA01g10150D, BnaA01g11580D, BnaA01g12700D, BnaA01g12710D, BnaA01g13230D, BnaA01g19720D, BnaA01g21580D, BnaA01g23970D, BnaA01g24190D, BnaA01g24270D, BnaA01g24460D, BnaA01g25970D, BnaA01g27140D, BnaA01g27…	BNAA01G00290D, BNAA01G00710D, BNAA01G02570D, BNAA01G05150D, BNAA01G06910D, BNAA01G07630D, BNAA01G07650D, BNAA01G08340D, BNAA01G08830D, BNAA01G09660D, BNAA01G09690D, BNAA01G09760D, BNAA01G10110D, BNAA01G10150D, BNAA01G11580D, BNAA01G12700D, BNAA01G12710D, BNAA01G13230D, BNAA01G19720D, BNAA01G21580D, BNAA01G23970D, BNAA01G24190D, BNAA01G24270D, BNAA01G24460D, BNAA01G25970D, BNAA01G27140D, BNAA01G27…
GO:1903506	regulation of nucleic acid-templated transcription	4386	998	814.78	8.6e-14	1.446e-10	P	BnaA01g00290D, BnaA01g00710D, BnaA01g02570D, BnaA01g05150D, BnaA01g06910D, BnaA01g07630D, BnaA01g07650D, BnaA01g08340D, BnaA01g08830D, BnaA01g09660D, BnaA01g09690D, BnaA01g09760D, BnaA01g10110D, BnaA01g10150D, BnaA01g11580D, BnaA01g12700D, BnaA01g12710D, BnaA01g13230D, BnaA01g19720D, BnaA01g21580D, BnaA01g23970D, BnaA01g24190D, BnaA01g24270D, BnaA01g24460D, BnaA01g25970D, BnaA01g27140D, BnaA01g27…	BNAA01G00290D, BNAA01G00710D, BNAA01G02570D, BNAA01G05150D, BNAA01G06910D, BNAA01G07630D, BNAA01G07650D, BNAA01G08340D, BNAA01G08830D, BNAA01G09660D, BNAA01G09690D, BNAA01G09760D, BNAA01G10110D, BNAA01G10150D, BNAA01G11580D, BNAA01G12700D, BNAA01G12710D, BNAA01G13230D, BNAA01G19720D, BNAA01G21580D, BNAA01G23970D, BNAA01G24190D, BNAA01G24270D, BNAA01G24460D, BNAA01G25970D, BNAA01G27140D, BNAA01G27…
GO:2001141	regulation of RNA biosynthetic process	4386	998	814.78	8.6e-14	1.446e-10	P	BnaA01g00290D, BnaA01g00710D, BnaA01g02570D, BnaA01g05150D, BnaA01g06910D, BnaA01g07630D, BnaA01g07650D, BnaA01g08340D, BnaA01g08830D, BnaA01g09660D, BnaA01g09690D, BnaA01g09760D, BnaA01g10110D, BnaA01g10150D, BnaA01g11580D, BnaA01g12700D, BnaA01g12710D, BnaA01g13230D, BnaA01g19720D, BnaA01g21580D, BnaA01g23970D, BnaA01g24190D, BnaA01g24270D, BnaA01g24460D, BnaA01g25970D, BnaA01g27140D, BnaA01g27…	BNAA01G00290D, BNAA01G00710D, BNAA01G02570D, BNAA01G05150D, BNAA01G06910D, BNAA01G07630D, BNAA01G07650D, BNAA01G08340D, BNAA01G08830D, BNAA01G09660D, BNAA01G09690D, BNAA01G09760D, BNAA01G10110D, BNAA01G10150D, BNAA01G11580D, BNAA01G12700D, BNAA01G12710D, BNAA01G13230D, BNAA01G19720D, BNAA01G21580D, BNAA01G23970D, BNAA01G24190D, BNAA01G24270D, BNAA01G24460D, BNAA01G25970D, BNAA01G27140D, BNAA01G27…
GO:0006351	transcription, DNA-templated	4763	1071	884.81	2.3e-13	2.421e-10	P	BnaA01g00290D, BnaA01g00710D, BnaA01g02570D, BnaA01g05150D, BnaA01g06910D, BnaA01g07630D, BnaA01g07650D, BnaA01g08340D, BnaA01g08830D, BnaA01g09660D, BnaA01g09690D, BnaA01g09760D, BnaA01g10110D, BnaA01g10150D, BnaA01g11580D, BnaA01g12700D, BnaA01g12710D, BnaA01g13230D, BnaA01g19720D, BnaA01g21580D, BnaA01g23970D, BnaA01g24190D, BnaA01g24270D, BnaA01g24370D, BnaA01g24460D, BnaA01g25970D, BnaA01g26…	BNAA01G00290D, BNAA01G00710D, BNAA01G02570D, BNAA01G05150D, BNAA01G06910D, BNAA01G07630D, BNAA01G07650D, BNAA01G08340D, BNAA01G08830D, BNAA01G09660D, BNAA01G09690D, BNAA01G09760D, BNAA01G10110D, BNAA01G10150D, BNAA01G11580D, BNAA01G12700D, BNAA01G12710D, BNAA01G13230D, BNAA01G19720D, BNAA01G21580D, BNAA01G23970D, BNAA01G24190D, BNAA01G24270D, BNAA01G24370D, BNAA01G24460D, BNAA01G25970D, BNAA01G26…
GO:0051252	regulation of RNA metabolic process	4423	1002	821.65	2.4e-13	2.421e-10	P	BnaA01g00290D, BnaA01g00710D, BnaA01g02570D, BnaA01g05150D, BnaA01g06910D, BnaA01g07630D, BnaA01g07650D, BnaA01g08340D, BnaA01g08830D, BnaA01g09660D, BnaA01g09690D, BnaA01g09760D, BnaA01g10110D, BnaA01g10150D, BnaA01g11580D, BnaA01g12700D, BnaA01g12710D, BnaA01g13230D, BnaA01g19720D, BnaA01g21580D, BnaA01g23970D, BnaA01g24190D, BnaA01g24270D, BnaA01g24460D, BnaA01g25970D, BnaA01g27140D, BnaA01g27…	BNAA01G00290D, BNAA01G00710D, BNAA01G02570D, BNAA01G05150D, BNAA01G06910D, BNAA01G07630D, BNAA01G07650D, BNAA01G08340D, BNAA01G08830D, BNAA01G09660D, BNAA01G09690D, BNAA01G09760D, BNAA01G10110D, BNAA01G10150D, BNAA01G11580D, BNAA01G12700D, BNAA01G12710D, BNAA01G13230D, BNAA01G19720D, BNAA01G21580D, BNAA01G23970D, BNAA01G24190D, BNAA01G24270D, BNAA01G24460D, BNAA01G25970D, BNAA01G27140D, BNAA01G27…
GO:0097659	nucleic acid-templated transcription	4810	1078	893.54	4.5e-13	3.783e-10	P	BnaA01g00290D, BnaA01g00710D, BnaA01g02570D, BnaA01g05150D, BnaA01g06910D, BnaA01g07630D, BnaA01g07650D, BnaA01g08340D, BnaA01g08830D, BnaA01g09660D, BnaA01g09690D, BnaA01g09760D, BnaA01g10110D, BnaA01g10150D, BnaA01g11580D, BnaA01g12700D, BnaA01g12710D, BnaA01g13230D, BnaA01g19720D, BnaA01g21580D, BnaA01g23970D, BnaA01g24190D, BnaA01g24270D, BnaA01g24370D, BnaA01g24460D, BnaA01g25370D, BnaA01g25…	BNAA01G00290D, BNAA01G00710D, BNAA01G02570D, BNAA01G05150D, BNAA01G06910D, BNAA01G07630D, BNAA01G07650D, BNAA01G08340D, BNAA01G08830D, BNAA01G09660D, BNAA01G09690D, BNAA01G09760D, BNAA01G10110D, BNAA01G10150D, BNAA01G11580D, BNAA01G12700D, BNAA01G12710D, BNAA01G13230D, BNAA01G19720D, BNAA01G21580D, BNAA01G23970D, BNAA01G24190D, BNAA01G24270D, BNAA01G24370D, BNAA01G24460D, BNAA01G25370D, BNAA01G25…
GO:0032774	RNA biosynthetic process	4819	1079	895.21	5.7e-13	4.107e-10	P	BnaA01g00290D, BnaA01g00710D, BnaA01g02570D, BnaA01g05150D, BnaA01g06910D, BnaA01g07630D, BnaA01g07650D, BnaA01g08340D, BnaA01g08830D, BnaA01g09660D, BnaA01g09690D, BnaA01g09760D, BnaA01g10110D, BnaA01g10150D, BnaA01g11580D, BnaA01g12700D, BnaA01g12710D, BnaA01g13230D, BnaA01g19720D, BnaA01g21580D, BnaA01g23970D, BnaA01g24190D, BnaA01g24270D, BnaA01g24370D, BnaA01g24460D, BnaA01g25370D, BnaA01g25…	BNAA01G00290D, BNAA01G00710D, BNAA01G02570D, BNAA01G05150D, BNAA01G06910D, BNAA01G07630D, BNAA01G07650D, BNAA01G08340D, BNAA01G08830D, BNAA01G09660D, BNAA01G09690D, BNAA01G09760D, BNAA01G10110D, BNAA01G10150D, BNAA01G11580D, BNAA01G12700D, BNAA01G12710D, BNAA01G13230D, BNAA01G19720D, BNAA01G21580D, BNAA01G23970D, BNAA01G24190D, BNAA01G24270D, BNAA01G24370D, BNAA01G24460D, BNAA01G25370D, BNAA01G25…
GO:0019219	regulation of nucleobase-containing compound metabolic process	4497	1008	835.4	3e-12	1.891e-09	P	BnaA01g00290D, BnaA01g00710D, BnaA01g02570D, BnaA01g05150D, BnaA01g06910D, BnaA01g07630D, BnaA01g07650D, BnaA01g08340D, BnaA01g08830D, BnaA01g09660D, BnaA01g09690D, BnaA01g09760D, BnaA01g10110D, BnaA01g10150D, BnaA01g11580D, BnaA01g12700D, BnaA01g12710D, BnaA01g13230D, BnaA01g19720D, BnaA01g21580D, BnaA01g23970D, BnaA01g24190D, BnaA01g24270D, BnaA01g24460D, BnaA01g25970D, BnaA01g27140D, BnaA01g27…	BNAA01G00290D, BNAA01G00710D, BNAA01G02570D, BNAA01G05150D, BNAA01G06910D, BNAA01G07630D, BNAA01G07650D, BNAA01G08340D, BNAA01G08830D, BNAA01G09660D, BNAA01G09690D, BNAA01G09760D, BNAA01G10110D, BNAA01G10150D, BNAA01G11580D, BNAA01G12700D, BNAA01G12710D, BNAA01G13230D, BNAA01G19720D, BNAA01G21580D, BNAA01G23970D, BNAA01G24190D, BNAA01G24270D, BNAA01G24460D, BNAA01G25970D, BNAA01G27140D, BNAA01G27…
GO:0019222	regulation of metabolic process	5937	1293	1102.9	6.5e-12	3.459e-09	P	BnaA01g00290D, BnaA01g00710D, BnaA01g02570D, BnaA01g05150D, BnaA01g06810D, BnaA01g06910D, BnaA01g07630D, BnaA01g07650D, BnaA01g07860D, BnaA01g08340D, BnaA01g08830D, BnaA01g09660D, BnaA01g09690D, BnaA01g09760D, BnaA01g09780D, BnaA01g10110D, BnaA01g10150D, BnaA01g11580D, BnaA01g12700D, BnaA01g12710D, BnaA01g13060D, BnaA01g13230D, BnaA01g14610D, BnaA01g15360D, BnaA01g16740D, BnaA01g19720D, BnaA01g19…	BNAA01G00290D, BNAA01G00710D, BNAA01G02570D, BNAA01G05150D, BNAA01G06810D, BNAA01G06910D, BNAA01G07630D, BNAA01G07650D, BNAA01G07860D, BNAA01G08340D, BNAA01G08830D, BNAA01G09660D, BNAA01G09690D, BNAA01G09760D, BNAA01G09780D, BNAA01G10110D, BNAA01G10150D, BNAA01G11580D, BNAA01G12700D, BNAA01G12710D, BNAA01G13060D, BNAA01G13230D, BNAA01G14610D, BNAA01G15360D, BNAA01G16740D, BNAA01G19720D, BNAA01G19…
GO:0043086	negative regulation of catalytic activity	551	168	102.36	7.5e-12	3.459e-09	P	BnaA01g14610D, BnaA01g27310D, BnaA01g27330D, BnaA01g27340D, BnaA01g27350D, BnaA01g30250D, BnaA01g35740D, BnaA02g25380D, BnaA02g25810D, BnaA03g10990D, BnaA03g34440D, BnaA03g34450D, BnaA03g34460D, BnaA03g35120D, BnaA03g36720D, BnaA03g36740D, BnaA03g37600D, BnaA03g42640D, BnaA04g26890D, BnaA05g17590D, BnaA05g21620D, BnaA06g15990D, BnaA06g17230D, BnaA06g29940D, BnaA06g35460D, BnaA06g36650D, BnaA06g40…	BNAA01G14610D, BNAA01G27310D, BNAA01G27330D, BNAA01G27340D, BNAA01G27350D, BNAA01G30250D, BNAA01G35740D, BNAA02G25380D, BNAA02G25810D, BNAA03G10990D, BNAA03G34440D, BNAA03G34450D, BNAA03G34460D, BNAA03G35120D, BNAA03G36720D, BNAA03G36740D, BNAA03G37600D, BNAA03G42640D, BNAA04G26890D, BNAA05G17590D, BNAA05G21620D, BNAA06G15990D, BNAA06G17230D, BNAA06G29940D, BNAA06G35460D, BNAA06G36650D, BNAA06G40…
GO:0033865	nucleoside bisphosphate metabolic process	86	44	15.98	9.4e-12	3.459e-09	P	BnaA03g34540D, BnaA06g01300D, BnaA07g32810D, BnaA09g24970D, BnaA10g13960D, BnaC02g14730D, BnaC02g14750D, BnaC02g14760D, BnaC02g28470D, BnaC02g46820D, BnaC03g37310D, BnaC03g40030D, BnaC03g40390D, BnaC04g14900D, BnaC04g21570D, BnaC04g27920D, BnaC05g13170D, BnaC05g21150D, BnaC05g34630D, BnaC05g37990D, BnaC05g41800D, BnaC05g49150D, BnaC06g05890D, BnaC06g10560D, BnaC06g19310D, BnaC06g22240D, BnaC06g26…	BNAA03G34540D, BNAA06G01300D, BNAA07G32810D, BNAA09G24970D, BNAA10G13960D, BNAC02G14730D, BNAC02G14750D, BNAC02G14760D, BNAC02G28470D, BNAC02G46820D, BNAC03G37310D, BNAC03G40030D, BNAC03G40390D, BNAC04G14900D, BNAC04G21570D, BNAC04G27920D, BNAC05G13170D, BNAC05G21150D, BNAC05G34630D, BNAC05G37990D, BNAC05G41800D, BNAC05G49150D, BNAC06G05890D, BNAC06G10560D, BNAC06G19310D, BNAC06G22240D, BNAC06G26…
GO:0033875	ribonucleoside bisphosphate metabolic process	86	44	15.98	9.4e-12	3.459e-09	P	BnaA03g34540D, BnaA06g01300D, BnaA07g32810D, BnaA09g24970D, BnaA10g13960D, BnaC02g14730D, BnaC02g14750D, BnaC02g14760D, BnaC02g28470D, BnaC02g46820D, BnaC03g37310D, BnaC03g40030D, BnaC03g40390D, BnaC04g14900D, BnaC04g21570D, BnaC04g27920D, BnaC05g13170D, BnaC05g21150D, BnaC05g34630D, BnaC05g37990D, BnaC05g41800D, BnaC05g49150D, BnaC06g05890D, BnaC06g10560D, BnaC06g19310D, BnaC06g22240D, BnaC06g26…	BNAA03G34540D, BNAA06G01300D, BNAA07G32810D, BNAA09G24970D, BNAA10G13960D, BNAC02G14730D, BNAC02G14750D, BNAC02G14760D, BNAC02G28470D, BNAC02G46820D, BNAC03G37310D, BNAC03G40030D, BNAC03G40390D, BNAC04G14900D, BNAC04G21570D, BNAC04G27920D, BNAC05G13170D, BNAC05G21150D, BNAC05G34630D, BNAC05G37990D, BNAC05G41800D, BNAC05G49150D, BNAC06G05890D, BNAC06G10560D, BNAC06G19310D, BNAC06G22240D, BNAC06G26…
GO:0034032	purine nucleoside bisphosphate metabolic process	86	44	15.98	9.4e-12	3.459e-09	P	BnaA03g34540D, BnaA06g01300D, BnaA07g32810D, BnaA09g24970D, BnaA10g13960D, BnaC02g14730D, BnaC02g14750D, BnaC02g14760D, BnaC02g28470D, BnaC02g46820D, BnaC03g37310D, BnaC03g40030D, BnaC03g40390D, BnaC04g14900D, BnaC04g21570D, BnaC04g27920D, BnaC05g13170D, BnaC05g21150D, BnaC05g34630D, BnaC05g37990D, BnaC05g41800D, BnaC05g49150D, BnaC06g05890D, BnaC06g10560D, BnaC06g19310D, BnaC06g22240D, BnaC06g26…	BNAA03G34540D, BNAA06G01300D, BNAA07G32810D, BNAA09G24970D, BNAA10G13960D, BNAC02G14730D, BNAC02G14750D, BNAC02G14760D, BNAC02G28470D, BNAC02G46820D, BNAC03G37310D, BNAC03G40030D, BNAC03G40390D, BNAC04G14900D, BNAC04G21570D, BNAC04G27920D, BNAC05G13170D, BNAC05G21150D, BNAC05G34630D, BNAC05G37990D, BNAC05G41800D, BNAC05G49150D, BNAC06G05890D, BNAC06G10560D, BNAC06G19310D, BNAC06G22240D, BNAC06G26…
GO:2000112	regulation of cellular macromolecule biosynthetic process	4533	1011	842.08	9.6e-12	3.459e-09	P	BnaA01g00290D, BnaA01g00710D, BnaA01g02570D, BnaA01g05150D, BnaA01g06910D, BnaA01g07630D, BnaA01g07650D, BnaA01g08340D, BnaA01g08830D, BnaA01g09660D, BnaA01g09690D, BnaA01g09760D, BnaA01g10110D, BnaA01g10150D, BnaA01g11580D, BnaA01g12700D, BnaA01g12710D, BnaA01g13230D, BnaA01g19720D, BnaA01g21580D, BnaA01g23970D, BnaA01g24190D, BnaA01g24270D, BnaA01g24460D, BnaA01g25970D, BnaA01g27140D, BnaA01g27…	BNAA01G00290D, BNAA01G00710D, BNAA01G02570D, BNAA01G05150D, BNAA01G06910D, BNAA01G07630D, BNAA01G07650D, BNAA01G08340D, BNAA01G08830D, BNAA01G09660D, BNAA01G09690D, BNAA01G09760D, BNAA01G10110D, BNAA01G10150D, BNAA01G11580D, BNAA01G12700D, BNAA01G12710D, BNAA01G13230D, BNAA01G19720D, BNAA01G21580D, BNAA01G23970D, BNAA01G24190D, BNAA01G24270D, BNAA01G24460D, BNAA01G25970D, BNAA01G27140D, BNAA01G27…
GO:0010556	regulation of macromolecule biosynthetic process	4565	1016	848.03	1.4e-11	4.708e-09	P	BnaA01g00290D, BnaA01g00710D, BnaA01g02570D, BnaA01g05150D, BnaA01g06910D, BnaA01g07630D, BnaA01g07650D, BnaA01g08340D, BnaA01g08830D, BnaA01g09660D, BnaA01g09690D, BnaA01g09760D, BnaA01g10110D, BnaA01g10150D, BnaA01g11580D, BnaA01g12700D, BnaA01g12710D, BnaA01g13230D, BnaA01g19720D, BnaA01g21580D, BnaA01g23970D, BnaA01g24190D, BnaA01g24270D, BnaA01g24460D, BnaA01g25970D, BnaA01g27140D, BnaA01g27…	BNAA01G00290D, BNAA01G00710D, BNAA01G02570D, BNAA01G05150D, BNAA01G06910D, BNAA01G07630D, BNAA01G07650D, BNAA01G08340D, BNAA01G08830D, BNAA01G09660D, BNAA01G09690D, BNAA01G09760D, BNAA01G10110D, BNAA01G10150D, BNAA01G11580D, BNAA01G12700D, BNAA01G12710D, BNAA01G13230D, BNAA01G19720D, BNAA01G21580D, BNAA01G23970D, BNAA01G24190D, BNAA01G24270D, BNAA01G24460D, BNAA01G25970D, BNAA01G27140D, BNAA01G27…
GO:0015936	coenzyme A metabolic process	75	40	13.93	1.5e-11	4.729e-09	P	BnaA07g32810D, BnaA09g24970D, BnaA10g13960D, BnaC02g14730D, BnaC02g14750D, BnaC02g14760D, BnaC02g28470D, BnaC02g46820D, BnaC03g37310D, BnaC03g40390D, BnaC04g14900D, BnaC04g21570D, BnaC04g27920D, BnaC05g13170D, BnaC05g21150D, BnaC05g34630D, BnaC05g37990D, BnaC05g41800D, BnaC05g49150D, BnaC06g05890D, BnaC06g19310D, BnaC06g22240D, BnaC06g26480D, BnaC06g30930D, BnaC06g31700D, BnaC07g11920D, BnaC07g12…	BNAA07G32810D, BNAA09G24970D, BNAA10G13960D, BNAC02G14730D, BNAC02G14750D, BNAC02G14760D, BNAC02G28470D, BNAC02G46820D, BNAC03G37310D, BNAC03G40390D, BNAC04G14900D, BNAC04G21570D, BNAC04G27920D, BNAC05G13170D, BNAC05G21150D, BNAC05G34630D, BNAC05G37990D, BNAC05G41800D, BNAC05G49150D, BNAC06G05890D, BNAC06G19310D, BNAC06G22240D, BNAC06G26480D, BNAC06G30930D, BNAC06G31700D, BNAC07G11920D, BNAC07G12…
GO:0044092	negative regulation of molecular function	565	170	104.96	1.9e-11	5.637e-09	P	BnaA01g14610D, BnaA01g27310D, BnaA01g27330D, BnaA01g27340D, BnaA01g27350D, BnaA01g30250D, BnaA01g35740D, BnaA02g25380D, BnaA02g25810D, BnaA03g10990D, BnaA03g34440D, BnaA03g34450D, BnaA03g34460D, BnaA03g35120D, BnaA03g36720D, BnaA03g36740D, BnaA03g37600D, BnaA03g42640D, BnaA04g26890D, BnaA05g17590D, BnaA05g21620D, BnaA06g15990D, BnaA06g17230D, BnaA06g29940D, BnaA06g35460D, BnaA06g36650D, BnaA06g40…	BNAA01G14610D, BNAA01G27310D, BNAA01G27330D, BNAA01G27340D, BNAA01G27350D, BNAA01G30250D, BNAA01G35740D, BNAA02G25380D, BNAA02G25810D, BNAA03G10990D, BNAA03G34440D, BNAA03G34450D, BNAA03G34460D, BNAA03G35120D, BNAA03G36720D, BNAA03G36740D, BNAA03G37600D, BNAA03G42640D, BNAA04G26890D, BNAA05G17590D, BNAA05G21620D, BNAA06G15990D, BNAA06G17230D, BNAA06G29940D, BNAA06G35460D, BNAA06G36650D, BNAA06G40…
GO:0031326	regulation of cellular biosynthetic process	4631	1026	860.29	3.3e-11	8.575e-09	P	BnaA01g00290D, BnaA01g00710D, BnaA01g02570D, BnaA01g05150D, BnaA01g06910D, BnaA01g07630D, BnaA01g07650D, BnaA01g08340D, BnaA01g08830D, BnaA01g09660D, BnaA01g09690D, BnaA01g09760D, BnaA01g10110D, BnaA01g10150D, BnaA01g11580D, BnaA01g12700D, BnaA01g12710D, BnaA01g13060D, BnaA01g13230D, BnaA01g19720D, BnaA01g21580D, BnaA01g23970D, BnaA01g24190D, BnaA01g24270D, BnaA01g24460D, BnaA01g25290D, BnaA01g25…	BNAA01G00290D, BNAA01G00710D, BNAA01G02570D, BNAA01G05150D, BNAA01G06910D, BNAA01G07630D, BNAA01G07650D, BNAA01G08340D, BNAA01G08830D, BNAA01G09660D, BNAA01G09690D, BNAA01G09760D, BNAA01G10110D, BNAA01G10150D, BNAA01G11580D, BNAA01G12700D, BNAA01G12710D, BNAA01G13060D, BNAA01G13230D, BNAA01G19720D, BNAA01G21580D, BNAA01G23970D, BNAA01G24190D, BNAA01G24270D, BNAA01G24460D, BNAA01G25290D, BNAA01G25…
GO:0009889	regulation of biosynthetic process	4651	1030	864	3.3e-11	8.575e-09	P	BnaA01g00290D, BnaA01g00710D, BnaA01g02570D, BnaA01g05150D, BnaA01g06910D, BnaA01g07630D, BnaA01g07650D, BnaA01g08340D, BnaA01g08830D, BnaA01g09660D, BnaA01g09690D, BnaA01g09760D, BnaA01g10110D, BnaA01g10150D, BnaA01g11580D, BnaA01g12700D, BnaA01g12710D, BnaA01g13060D, BnaA01g13230D, BnaA01g19720D, BnaA01g21580D, BnaA01g23970D, BnaA01g24190D, BnaA01g24270D, BnaA01g24460D, BnaA01g25290D, BnaA01g25…	BNAA01G00290D, BNAA01G00710D, BNAA01G02570D, BNAA01G05150D, BNAA01G06910D, BNAA01G07630D, BNAA01G07650D, BNAA01G08340D, BNAA01G08830D, BNAA01G09660D, BNAA01G09690D, BNAA01G09760D, BNAA01G10110D, BNAA01G10150D, BNAA01G11580D, BNAA01G12700D, BNAA01G12710D, BNAA01G13060D, BNAA01G13230D, BNAA01G19720D, BNAA01G21580D, BNAA01G23970D, BNAA01G24190D, BNAA01G24270D, BNAA01G24460D, BNAA01G25290D, BNAA01G25…
GO:0050789	regulation of biological process	8766	1840	1628.44	3.4e-11	8.575e-09	P	BnaA01g00290D, BnaA01g00710D, BnaA01g02570D, BnaA01g02730D, BnaA01g03250D, BnaA01g05150D, BnaA01g06810D, BnaA01g06910D, BnaA01g07630D, BnaA01g07650D, BnaA01g07860D, BnaA01g08340D, BnaA01g08830D, BnaA01g09620D, BnaA01g09660D, BnaA01g09680D, BnaA01g09690D, BnaA01g09760D, BnaA01g09780D, BnaA01g10110D, BnaA01g10150D, BnaA01g10160D, BnaA01g11580D, BnaA01g12700D, BnaA01g12710D, BnaA01g13060D, BnaA01g13…	BNAA01G00290D, BNAA01G00710D, BNAA01G02570D, BNAA01G02730D, BNAA01G03250D, BNAA01G05150D, BNAA01G06810D, BNAA01G06910D, BNAA01G07630D, BNAA01G07650D, BNAA01G07860D, BNAA01G08340D, BNAA01G08830D, BNAA01G09620D, BNAA01G09660D, BNAA01G09680D, BNAA01G09690D, BNAA01G09760D, BNAA01G09780D, BNAA01G10110D, BNAA01G10150D, BNAA01G10160D, BNAA01G11580D, BNAA01G12700D, BNAA01G12710D, BNAA01G13060D, BNAA01G13…
GO:0080090	regulation of primary metabolic process	5062	1108	940.35	9.5e-11	2.282e-08	P	BnaA01g00290D, BnaA01g00710D, BnaA01g02570D, BnaA01g05150D, BnaA01g06810D, BnaA01g06910D, BnaA01g07630D, BnaA01g07650D, BnaA01g08340D, BnaA01g08830D, BnaA01g09660D, BnaA01g09690D, BnaA01g09760D, BnaA01g10110D, BnaA01g10150D, BnaA01g11580D, BnaA01g12700D, BnaA01g12710D, BnaA01g13230D, BnaA01g16740D, BnaA01g19720D, BnaA01g19750D, BnaA01g21580D, BnaA01g23970D, BnaA01g24190D, BnaA01g24270D, BnaA01g24…	BNAA01G00290D, BNAA01G00710D, BNAA01G02570D, BNAA01G05150D, BNAA01G06810D, BNAA01G06910D, BNAA01G07630D, BNAA01G07650D, BNAA01G08340D, BNAA01G08830D, BNAA01G09660D, BNAA01G09690D, BNAA01G09760D, BNAA01G10110D, BNAA01G10150D, BNAA01G11580D, BNAA01G12700D, BNAA01G12710D, BNAA01G13230D, BNAA01G16740D, BNAA01G19720D, BNAA01G19750D, BNAA01G21580D, BNAA01G23970D, BNAA01G24190D, BNAA01G24270D, BNAA01G24…
GO:0051171	regulation of nitrogen compound metabolic process	4659	1022	865.49	3.7e-10	8.483e-08	P	BnaA01g00290D, BnaA01g00710D, BnaA01g02570D, BnaA01g05150D, BnaA01g06910D, BnaA01g07630D, BnaA01g07650D, BnaA01g08340D, BnaA01g08830D, BnaA01g09660D, BnaA01g09690D, BnaA01g09760D, BnaA01g10110D, BnaA01g10150D, BnaA01g11580D, BnaA01g12700D, BnaA01g12710D, BnaA01g13230D, BnaA01g19720D, BnaA01g21580D, BnaA01g23970D, BnaA01g24190D, BnaA01g24270D, BnaA01g24460D, BnaA01g25290D, BnaA01g25970D, BnaA01g27…	BNAA01G00290D, BNAA01G00710D, BNAA01G02570D, BNAA01G05150D, BNAA01G06910D, BNAA01G07630D, BNAA01G07650D, BNAA01G08340D, BNAA01G08830D, BNAA01G09660D, BNAA01G09690D, BNAA01G09760D, BNAA01G10110D, BNAA01G10150D, BNAA01G11580D, BNAA01G12700D, BNAA01G12710D, BNAA01G13230D, BNAA01G19720D, BNAA01G21580D, BNAA01G23970D, BNAA01G24190D, BNAA01G24270D, BNAA01G24460D, BNAA01G25290D, BNAA01G25970D, BNAA01G27…
GO:0031323	regulation of cellular metabolic process	5141	1117	955.03	4.7e-10	1.031e-07	P	BnaA01g00290D, BnaA01g00710D, BnaA01g02570D, BnaA01g05150D, BnaA01g06810D, BnaA01g06910D, BnaA01g07630D, BnaA01g07650D, BnaA01g08340D, BnaA01g08830D, BnaA01g09660D, BnaA01g09690D, BnaA01g09760D, BnaA01g10110D, BnaA01g10150D, BnaA01g11580D, BnaA01g12700D, BnaA01g12710D, BnaA01g13060D, BnaA01g13230D, BnaA01g15360D, BnaA01g16740D, BnaA01g19720D, BnaA01g19750D, BnaA01g21580D, BnaA01g23970D, BnaA01g24…	BNAA01G00290D, BNAA01G00710D, BNAA01G02570D, BNAA01G05150D, BNAA01G06810D, BNAA01G06910D, BNAA01G07630D, BNAA01G07650D, BNAA01G08340D, BNAA01G08830D, BNAA01G09660D, BNAA01G09690D, BNAA01G09760D, BNAA01G10110D, BNAA01G10150D, BNAA01G11580D, BNAA01G12700D, BNAA01G12710D, BNAA01G13060D, BNAA01G13230D, BNAA01G15360D, BNAA01G16740D, BNAA01G19720D, BNAA01G19750D, BNAA01G21580D, BNAA01G23970D, BNAA01G24…
GO:0010468	regulation of gene expression	4702	1029	873.48	5.4e-10	1.135e-07	P	BnaA01g00290D, BnaA01g00710D, BnaA01g02570D, BnaA01g05150D, BnaA01g06810D, BnaA01g06910D, BnaA01g07630D, BnaA01g07650D, BnaA01g07860D, BnaA01g08340D, BnaA01g08830D, BnaA01g09660D, BnaA01g09690D, BnaA01g09760D, BnaA01g09780D, BnaA01g10110D, BnaA01g10150D, BnaA01g11580D, BnaA01g12700D, BnaA01g12710D, BnaA01g13230D, BnaA01g19720D, BnaA01g21390D, BnaA01g21580D, BnaA01g23970D, BnaA01g24190D, BnaA01g24…	BNAA01G00290D, BNAA01G00710D, BNAA01G02570D, BNAA01G05150D, BNAA01G06810D, BNAA01G06910D, BNAA01G07630D, BNAA01G07650D, BNAA01G07860D, BNAA01G08340D, BNAA01G08830D, BNAA01G09660D, BNAA01G09690D, BNAA01G09760D, BNAA01G09780D, BNAA01G10110D, BNAA01G10150D, BNAA01G11580D, BNAA01G12700D, BNAA01G12710D, BNAA01G13230D, BNAA01G19720D, BNAA01G21390D, BNAA01G21580D, BNAA01G23970D, BNAA01G24190D, BNAA01G24…
GO:0060255	regulation of macromolecule metabolic process	5153	1118	957.26	6.5e-10	1.311e-07	P	BnaA01g00290D, BnaA01g00710D, BnaA01g02570D, BnaA01g05150D, BnaA01g06810D, BnaA01g06910D, BnaA01g07630D, BnaA01g07650D, BnaA01g07860D, BnaA01g08340D, BnaA01g08830D, BnaA01g09660D, BnaA01g09690D, BnaA01g09760D, BnaA01g09780D, BnaA01g10110D, BnaA01g10150D, BnaA01g11580D, BnaA01g12700D, BnaA01g12710D, BnaA01g13230D, BnaA01g16740D, BnaA01g19720D, BnaA01g19750D, BnaA01g21390D, BnaA01g21580D, BnaA01g23…	BNAA01G00290D, BNAA01G00710D, BNAA01G02570D, BNAA01G05150D, BNAA01G06810D, BNAA01G06910D, BNAA01G07630D, BNAA01G07650D, BNAA01G07860D, BNAA01G08340D, BNAA01G08830D, BNAA01G09660D, BNAA01G09690D, BNAA01G09760D, BNAA01G09780D, BNAA01G10110D, BNAA01G10150D, BNAA01G11580D, BNAA01G12700D, BNAA01G12710D, BNAA01G13230D, BNAA01G16740D, BNAA01G19720D, BNAA01G19750D, BNAA01G21390D, BNAA01G21580D, BNAA01G23…
GO:0065007	biological regulation	9259	1918	1720.02	9.8e-10	1.901e-07	P	BnaA01g00240D, BnaA01g00290D, BnaA01g00710D, BnaA01g02570D, BnaA01g02730D, BnaA01g03250D, BnaA01g05150D, BnaA01g06810D, BnaA01g06910D, BnaA01g07630D, BnaA01g07650D, BnaA01g07860D, BnaA01g08340D, BnaA01g08830D, BnaA01g09620D, BnaA01g09660D, BnaA01g09680D, BnaA01g09690D, BnaA01g09760D, BnaA01g09780D, BnaA01g10110D, BnaA01g10150D, BnaA01g10160D, BnaA01g11580D, BnaA01g12700D, BnaA01g12710D, BnaA01g13…	BNAA01G00240D, BNAA01G00290D, BNAA01G00710D, BNAA01G02570D, BNAA01G02730D, BNAA01G03250D, BNAA01G05150D, BNAA01G06810D, BNAA01G06910D, BNAA01G07630D, BNAA01G07650D, BNAA01G07860D, BNAA01G08340D, BNAA01G08830D, BNAA01G09620D, BNAA01G09660D, BNAA01G09680D, BNAA01G09690D, BNAA01G09760D, BNAA01G09780D, BNAA01G10110D, BNAA01G10150D, BNAA01G10160D, BNAA01G11580D, BNAA01G12700D, BNAA01G12710D, BNAA01G13…
GO:0034654	nucleobase-containing compound biosynthetic process	5322	1145	988.65	2.8e-09	5.231e-07	P	BnaA01g00290D, BnaA01g00710D, BnaA01g02570D, BnaA01g05150D, BnaA01g06910D, BnaA01g07630D, BnaA01g07650D, BnaA01g08340D, BnaA01g08830D, BnaA01g09650D, BnaA01g09660D, BnaA01g09690D, BnaA01g09760D, BnaA01g10110D, BnaA01g10150D, BnaA01g11580D, BnaA01g12700D, BnaA01g12710D, BnaA01g13230D, BnaA01g19720D, BnaA01g21580D, BnaA01g23970D, BnaA01g24190D, BnaA01g24270D, BnaA01g24370D, BnaA01g24460D, BnaA01g25…	BNAA01G00290D, BNAA01G00710D, BNAA01G02570D, BNAA01G05150D, BNAA01G06910D, BNAA01G07630D, BNAA01G07650D, BNAA01G08340D, BNAA01G08830D, BNAA01G09650D, BNAA01G09660D, BNAA01G09690D, BNAA01G09760D, BNAA01G10110D, BNAA01G10150D, BNAA01G11580D, BNAA01G12700D, BNAA01G12710D, BNAA01G13230D, BNAA01G19720D, BNAA01G21580D, BNAA01G23970D, BNAA01G24190D, BNAA01G24270D, BNAA01G24370D, BNAA01G24460D, BNAA01G25…
GO:0018130	heterocycle biosynthetic process	5787	1217	1075.04	1.5e-07	2.609e-05	P	BnaA01g00290D, BnaA01g00710D, BnaA01g02570D, BnaA01g05150D, BnaA01g06910D, BnaA01g07630D, BnaA01g07650D, BnaA01g08340D, BnaA01g08830D, BnaA01g09650D, BnaA01g09660D, BnaA01g09690D, BnaA01g09760D, BnaA01g10110D, BnaA01g10150D, BnaA01g11580D, BnaA01g12700D, BnaA01g12710D, BnaA01g13230D, BnaA01g19720D, BnaA01g21580D, BnaA01g23970D, BnaA01g24190D, BnaA01g24270D, BnaA01g24370D, BnaA01g24460D, BnaA01g25…	BNAA01G00290D, BNAA01G00710D, BNAA01G02570D, BNAA01G05150D, BNAA01G06910D, BNAA01G07630D, BNAA01G07650D, BNAA01G08340D, BNAA01G08830D, BNAA01G09650D, BNAA01G09660D, BNAA01G09690D, BNAA01G09760D, BNAA01G10110D, BNAA01G10150D, BNAA01G11580D, BNAA01G12700D, BNAA01G12710D, BNAA01G13230D, BNAA01G19720D, BNAA01G21580D, BNAA01G23970D, BNAA01G24190D, BNAA01G24270D, BNAA01G24370D, BNAA01G24460D, BNAA01G25…
GO:0050794	regulation of cellular process	7707	1590	1431.71	1.5e-07	2.609e-05	P	BnaA01g00290D, BnaA01g00710D, BnaA01g02570D, BnaA01g02730D, BnaA01g05150D, BnaA01g06810D, BnaA01g06910D, BnaA01g07630D, BnaA01g07650D, BnaA01g07860D, BnaA01g08340D, BnaA01g08830D, BnaA01g09620D, BnaA01g09660D, BnaA01g09680D, BnaA01g09690D, BnaA01g09760D, BnaA01g10110D, BnaA01g10150D, BnaA01g10160D, BnaA01g11580D, BnaA01g12700D, BnaA01g12710D, BnaA01g13060D, BnaA01g13230D, BnaA01g15360D, BnaA01g16…	BNAA01G00290D, BNAA01G00710D, BNAA01G02570D, BNAA01G02730D, BNAA01G05150D, BNAA01G06810D, BNAA01G06910D, BNAA01G07630D, BNAA01G07650D, BNAA01G07860D, BNAA01G08340D, BNAA01G08830D, BNAA01G09620D, BNAA01G09660D, BNAA01G09680D, BNAA01G09690D, BNAA01G09760D, BNAA01G10110D, BNAA01G10150D, BNAA01G10160D, BNAA01G11580D, BNAA01G12700D, BNAA01G12710D, BNAA01G13060D, BNAA01G13230D, BNAA01G15360D, BNAA01G16…
GO:0016070	RNA metabolic process	6088	1263	1130.95	1.5e-06	0.0002522	P	BnaA01g00290D, BnaA01g00710D, BnaA01g02570D, BnaA01g03990D, BnaA01g05150D, BnaA01g06910D, BnaA01g07630D, BnaA01g07650D, BnaA01g08340D, BnaA01g08830D, BnaA01g09660D, BnaA01g09690D, BnaA01g09760D, BnaA01g10110D, BnaA01g10150D, BnaA01g11260D, BnaA01g11580D, BnaA01g12700D, BnaA01g12710D, BnaA01g13230D, BnaA01g18620D, BnaA01g19720D, BnaA01g21580D, BnaA01g23970D, BnaA01g24190D, BnaA01g24270D, BnaA01g24…	BNAA01G00290D, BNAA01G00710D, BNAA01G02570D, BNAA01G03990D, BNAA01G05150D, BNAA01G06910D, BNAA01G07630D, BNAA01G07650D, BNAA01G08340D, BNAA01G08830D, BNAA01G09660D, BNAA01G09690D, BNAA01G09760D, BNAA01G10110D, BNAA01G10150D, BNAA01G11260D, BNAA01G11580D, BNAA01G12700D, BNAA01G12710D, BNAA01G13230D, BNAA01G18620D, BNAA01G19720D, BNAA01G21580D, BNAA01G23970D, BNAA01G24190D, BNAA01G24270D, BNAA01G24…
GO:0019438	aromatic compound biosynthetic process	5793	1202	1076.15	2.8e-06	0.0004556	P	BnaA01g00290D, BnaA01g00710D, BnaA01g02570D, BnaA01g05150D, BnaA01g06910D, BnaA01g07630D, BnaA01g07650D, BnaA01g08340D, BnaA01g08830D, BnaA01g09650D, BnaA01g09660D, BnaA01g09690D, BnaA01g09760D, BnaA01g10110D, BnaA01g10150D, BnaA01g11580D, BnaA01g12700D, BnaA01g12710D, BnaA01g13230D, BnaA01g19720D, BnaA01g21580D, BnaA01g23970D, BnaA01g24190D, BnaA01g24270D, BnaA01g24370D, BnaA01g24460D, BnaA01g25…	BNAA01G00290D, BNAA01G00710D, BNAA01G02570D, BNAA01G05150D, BNAA01G06910D, BNAA01G07630D, BNAA01G07650D, BNAA01G08340D, BNAA01G08830D, BNAA01G09650D, BNAA01G09660D, BNAA01G09690D, BNAA01G09760D, BNAA01G10110D, BNAA01G10150D, BNAA01G11580D, BNAA01G12700D, BNAA01G12710D, BNAA01G13230D, BNAA01G19720D, BNAA01G21580D, BNAA01G23970D, BNAA01G24190D, BNAA01G24270D, BNAA01G24370D, BNAA01G24460D, BNAA01G25…
GO:1901362	organic cyclic compound biosynthetic process	5959	1234	1106.99	2.9e-06	0.0004571	P	BnaA01g00290D, BnaA01g00710D, BnaA01g02570D, BnaA01g05150D, BnaA01g06910D, BnaA01g07630D, BnaA01g07650D, BnaA01g08340D, BnaA01g08830D, BnaA01g09650D, BnaA01g09660D, BnaA01g09690D, BnaA01g09760D, BnaA01g10110D, BnaA01g10150D, BnaA01g11580D, BnaA01g12700D, BnaA01g12710D, BnaA01g13230D, BnaA01g19720D, BnaA01g21580D, BnaA01g23970D, BnaA01g24190D, BnaA01g24270D, BnaA01g24370D, BnaA01g24460D, BnaA01g25…	BNAA01G00290D, BNAA01G00710D, BNAA01G02570D, BNAA01G05150D, BNAA01G06910D, BNAA01G07630D, BNAA01G07650D, BNAA01G08340D, BNAA01G08830D, BNAA01G09650D, BNAA01G09660D, BNAA01G09690D, BNAA01G09760D, BNAA01G10110D, BNAA01G10150D, BNAA01G11580D, BNAA01G12700D, BNAA01G12710D, BNAA01G13230D, BNAA01G19720D, BNAA01G21580D, BNAA01G23970D, BNAA01G24190D, BNAA01G24270D, BNAA01G24370D, BNAA01G24460D, BNAA01G25…
GO:0034645	cellular macromolecule biosynthetic process	7309	1487	1357.77	9.9e-06	0.001513	P	BnaA01g00290D, BnaA01g00710D, BnaA01g02540D, BnaA01g02570D, BnaA01g05150D, BnaA01g06910D, BnaA01g07630D, BnaA01g07650D, BnaA01g08340D, BnaA01g08830D, BnaA01g09390D, BnaA01g09650D, BnaA01g09660D, BnaA01g09690D, BnaA01g09760D, BnaA01g10110D, BnaA01g10150D, BnaA01g11580D, BnaA01g12640D, BnaA01g12700D, BnaA01g12710D, BnaA01g13230D, BnaA01g19720D, BnaA01g20630D, BnaA01g21580D, BnaA01g23970D, BnaA01g24…	BNAA01G00290D, BNAA01G00710D, BNAA01G02540D, BNAA01G02570D, BNAA01G05150D, BNAA01G06910D, BNAA01G07630D, BNAA01G07650D, BNAA01G08340D, BNAA01G08830D, BNAA01G09390D, BNAA01G09650D, BNAA01G09660D, BNAA01G09690D, BNAA01G09760D, BNAA01G10110D, BNAA01G10150D, BNAA01G11580D, BNAA01G12640D, BNAA01G12700D, BNAA01G12710D, BNAA01G13230D, BNAA01G19720D, BNAA01G20630D, BNAA01G21580D, BNAA01G23970D, BNAA01G24…
GO:0009059	macromolecule biosynthetic process	7448	1507	1383.6	2.6e-05	0.003857	P	BnaA01g00290D, BnaA01g00710D, BnaA01g02540D, BnaA01g02570D, BnaA01g05150D, BnaA01g06910D, BnaA01g07630D, BnaA01g07650D, BnaA01g08340D, BnaA01g08830D, BnaA01g09390D, BnaA01g09650D, BnaA01g09660D, BnaA01g09690D, BnaA01g09760D, BnaA01g10110D, BnaA01g10150D, BnaA01g11580D, BnaA01g12640D, BnaA01g12700D, BnaA01g12710D, BnaA01g13230D, BnaA01g19720D, BnaA01g20630D, BnaA01g21580D, BnaA01g23970D, BnaA01g24…	BNAA01G00290D, BNAA01G00710D, BNAA01G02540D, BNAA01G02570D, BNAA01G05150D, BNAA01G06910D, BNAA01G07630D, BNAA01G07650D, BNAA01G08340D, BNAA01G08830D, BNAA01G09390D, BNAA01G09650D, BNAA01G09660D, BNAA01G09690D, BNAA01G09760D, BNAA01G10110D, BNAA01G10150D, BNAA01G11580D, BNAA01G12640D, BNAA01G12700D, BNAA01G12710D, BNAA01G13230D, BNAA01G19720D, BNAA01G20630D, BNAA01G21580D, BNAA01G23970D, BNAA01G24…
GO:0050790	regulation of catalytic activity	964	229	179.08	2.8e-05	0.004035	P	BnaA01g14610D, BnaA01g16740D, BnaA01g27310D, BnaA01g27330D, BnaA01g27340D, BnaA01g27350D, BnaA01g30250D, BnaA01g35740D, BnaA01g36570D, BnaA02g25210D, BnaA02g25380D, BnaA02g25810D, BnaA03g10990D, BnaA03g34440D, BnaA03g34450D, BnaA03g34460D, BnaA03g35120D, BnaA03g36720D, BnaA03g36740D, BnaA03g37600D, BnaA03g40430D, BnaA03g42640D, BnaA04g01040D, BnaA04g21520D, BnaA04g26890D, BnaA05g17590D, BnaA05g19…	BNAA01G14610D, BNAA01G16740D, BNAA01G27310D, BNAA01G27330D, BNAA01G27340D, BNAA01G27350D, BNAA01G30250D, BNAA01G35740D, BNAA01G36570D, BNAA02G25210D, BNAA02G25380D, BNAA02G25810D, BNAA03G10990D, BNAA03G34440D, BNAA03G34450D, BNAA03G34460D, BNAA03G35120D, BNAA03G36720D, BNAA03G36740D, BNAA03G37600D, BNAA03G40430D, BNAA03G42640D, BNAA04G01040D, BNAA04G21520D, BNAA04G26890D, BNAA05G17590D, BNAA05G19…
GO:0006508	proteolysis	2168	475	402.74	3.1e-05	0.004226	P	BnaA01g02060D, BnaA01g06930D, BnaA01g06940D, BnaA01g07720D, BnaA01g07860D, BnaA01g16880D, BnaA01g17120D, BnaA01g17990D, BnaA01g19050D, BnaA01g20790D, BnaA01g21100D, BnaA01g21110D, BnaA01g21330D, BnaA01g24580D, BnaA01g27270D, BnaA01g30370D, BnaA01g33210D, BnaA02g21750D, BnaA02g23080D, BnaA02g23310D, BnaA02g31880D, BnaA03g08770D, BnaA03g09640D, BnaA03g09650D, BnaA03g16190D, BnaA03g33300D, BnaA03g36…	BNAA01G02060D, BNAA01G06930D, BNAA01G06940D, BNAA01G07720D, BNAA01G07860D, BNAA01G16880D, BNAA01G17120D, BNAA01G17990D, BNAA01G19050D, BNAA01G20790D, BNAA01G21100D, BNAA01G21110D, BNAA01G21330D, BNAA01G24580D, BNAA01G27270D, BNAA01G30370D, BNAA01G33210D, BNAA02G21750D, BNAA02G23080D, BNAA02G23310D, BNAA02G31880D, BNAA03G08770D, BNAA03G09640D, BNAA03G09650D, BNAA03G16190D, BNAA03G33300D, BNAA03G36…
GO:0044271	cellular nitrogen compound biosynthetic process	7549	1525	1402.36	3.1e-05	0.004226	P	BnaA01g00290D, BnaA01g00710D, BnaA01g02540D, BnaA01g02570D, BnaA01g05150D, BnaA01g06910D, BnaA01g07630D, BnaA01g07650D, BnaA01g08340D, BnaA01g08830D, BnaA01g09650D, BnaA01g09660D, BnaA01g09690D, BnaA01g09760D, BnaA01g10110D, BnaA01g10150D, BnaA01g11580D, BnaA01g12700D, BnaA01g12710D, BnaA01g13230D, BnaA01g19720D, BnaA01g20630D, BnaA01g21580D, BnaA01g23970D, BnaA01g24190D, BnaA01g24270D, BnaA01g24…	BNAA01G00290D, BNAA01G00710D, BNAA01G02540D, BNAA01G02570D, BNAA01G05150D, BNAA01G06910D, BNAA01G07630D, BNAA01G07650D, BNAA01G08340D, BNAA01G08830D, BNAA01G09650D, BNAA01G09660D, BNAA01G09690D, BNAA01G09760D, BNAA01G10110D, BNAA01G10150D, BNAA01G11580D, BNAA01G12700D, BNAA01G12710D, BNAA01G13230D, BNAA01G19720D, BNAA01G20630D, BNAA01G21580D, BNAA01G23970D, BNAA01G24190D, BNAA01G24270D, BNAA01G24…
GO:0065009	regulation of molecular function	1001	236	185.95	3.6e-05	0.004779	P	BnaA01g14610D, BnaA01g16740D, BnaA01g27310D, BnaA01g27330D, BnaA01g27340D, BnaA01g27350D, BnaA01g30250D, BnaA01g35740D, BnaA01g36570D, BnaA02g25210D, BnaA02g25380D, BnaA02g25810D, BnaA03g10990D, BnaA03g34440D, BnaA03g34450D, BnaA03g34460D, BnaA03g35120D, BnaA03g36720D, BnaA03g36740D, BnaA03g37600D, BnaA03g40430D, BnaA03g42640D, BnaA04g01040D, BnaA04g21520D, BnaA04g26890D, BnaA05g17590D, BnaA05g19…	BNAA01G14610D, BNAA01G16740D, BNAA01G27310D, BNAA01G27330D, BNAA01G27340D, BNAA01G27350D, BNAA01G30250D, BNAA01G35740D, BNAA01G36570D, BNAA02G25210D, BNAA02G25380D, BNAA02G25810D, BNAA03G10990D, BNAA03G34440D, BNAA03G34450D, BNAA03G34460D, BNAA03G35120D, BNAA03G36720D, BNAA03G36740D, BNAA03G37600D, BNAA03G40430D, BNAA03G42640D, BNAA04G01040D, BNAA04G21520D, BNAA04G26890D, BNAA05G17590D, BNAA05G19…
GO:0009733	response to auxin	690	170	128.18	4e-05	0.005173	P	BnaA01g05940D, BnaA01g06910D, BnaA01g24190D, BnaA01g25350D, BnaA01g27950D, BnaA01g30290D, BnaA02g02480D, BnaA02g03870D, BnaA02g05090D, BnaA02g05100D, BnaA02g10190D, BnaA02g17300D, BnaA02g17320D, BnaA02g21320D, BnaA02g26940D, BnaA03g06800D, BnaA03g06810D, BnaA03g06820D, BnaA03g06830D, BnaA03g06840D, BnaA03g12170D, BnaA03g16580D, BnaA03g16940D, BnaA03g21130D, BnaA03g23520D, BnaA03g24040D, BnaA03g32…	BNAA01G05940D, BNAA01G06910D, BNAA01G24190D, BNAA01G25350D, BNAA01G27950D, BNAA01G30290D, BNAA02G02480D, BNAA02G03870D, BNAA02G05090D, BNAA02G05100D, BNAA02G10190D, BNAA02G17300D, BNAA02G17320D, BNAA02G21320D, BNAA02G26940D, BNAA03G06800D, BNAA03G06810D, BNAA03G06820D, BNAA03G06830D, BNAA03G06840D, BNAA03G12170D, BNAA03G16580D, BNAA03G16940D, BNAA03G21130D, BNAA03G23520D, BNAA03G24040D, BNAA03G32…
GO:0008234	cysteine-type peptidase activity	537	189	104.76	8.7e-18	2.153e-14	F	BnaA01g02060D, BnaA01g07720D, BnaA01g16880D, BnaA01g19050D, BnaA01g20790D, BnaA02g21750D, BnaA02g23080D, BnaA03g41840D, BnaA03g42440D, BnaA03g43110D, BnaA03g59100D, BnaA04g08580D, BnaA05g16790D, BnaA06g10380D, BnaA06g14690D, BnaA06g15980D, BnaA06g20990D, BnaA06g21000D, BnaA06g21250D, BnaA06g38410D, BnaA06g40240D, BnaA07g01790D, BnaA07g04940D, BnaA08g00230D, BnaA08g05910D, BnaA08g06330D, BnaA08g15…	BNAA01G02060D, BNAA01G07720D, BNAA01G16880D, BNAA01G19050D, BNAA01G20790D, BNAA02G21750D, BNAA02G23080D, BNAA03G41840D, BNAA03G42440D, BNAA03G43110D, BNAA03G59100D, BNAA04G08580D, BNAA05G16790D, BNAA06G10380D, BNAA06G14690D, BNAA06G15980D, BNAA06G20990D, BNAA06G21000D, BNAA06G21250D, BNAA06G38410D, BNAA06G40240D, BNAA07G01790D, BNAA07G04940D, BNAA08G00230D, BNAA08G05910D, BNAA08G06330D, BNAA08G15…
GO:0004420	hydroxymethylglutaryl-CoA reductase (NADPH) activity	55	35	10.73	1.1e-12	1.155e-09	F	BnaA07g32810D, BnaA09g24970D, BnaC02g14730D, BnaC02g14750D, BnaC02g14760D, BnaC02g28470D, BnaC02g46820D, BnaC03g37310D, BnaC04g14900D, BnaC04g21570D, BnaC04g27920D, BnaC05g13170D, BnaC05g21150D, BnaC05g41800D, BnaC05g49150D, BnaC06g05890D, BnaC06g19310D, BnaC06g22240D, BnaC06g26480D, BnaC06g30930D, BnaC06g31700D, BnaC07g11920D, BnaC07g12020D, BnaC07g13230D, BnaC07g38600D, BnaC08g00020D, BnaC08g23…	BNAA07G32810D, BNAA09G24970D, BNAC02G14730D, BNAC02G14750D, BNAC02G14760D, BNAC02G28470D, BNAC02G46820D, BNAC03G37310D, BNAC04G14900D, BNAC04G21570D, BNAC04G27920D, BNAC05G13170D, BNAC05G21150D, BNAC05G41800D, BNAC05G49150D, BNAC06G05890D, BNAC06G19310D, BNAC06G22240D, BNAC06G26480D, BNAC06G30930D, BNAC06G31700D, BNAC07G11920D, BNAC07G12020D, BNAC07G13230D, BNAC07G38600D, BNAC08G00020D, BNAC08G23…
GO:0004857	enzyme inhibitor activity	548	176	106.91	1.4e-12	1.155e-09	F	BnaA01g14610D, BnaA01g16740D, BnaA01g27310D, BnaA01g27330D, BnaA01g27340D, BnaA01g27350D, BnaA01g30250D, BnaA01g35740D, BnaA02g16230D, BnaA02g25810D, BnaA03g10990D, BnaA03g34440D, BnaA03g34450D, BnaA03g34460D, BnaA03g35120D, BnaA03g36720D, BnaA03g36740D, BnaA03g37600D, BnaA03g42640D, BnaA04g26890D, BnaA05g17590D, BnaA05g21620D, BnaA06g15990D, BnaA06g17230D, BnaA06g29940D, BnaA06g35460D, BnaA06g36…	BNAA01G14610D, BNAA01G16740D, BNAA01G27310D, BNAA01G27330D, BNAA01G27340D, BNAA01G27350D, BNAA01G30250D, BNAA01G35740D, BNAA02G16230D, BNAA02G25810D, BNAA03G10990D, BNAA03G34440D, BNAA03G34450D, BNAA03G34460D, BNAA03G35120D, BNAA03G36720D, BNAA03G36740D, BNAA03G37600D, BNAA03G42640D, BNAA04G26890D, BNAA05G17590D, BNAA05G21620D, BNAA06G15990D, BNAA06G17230D, BNAA06G29940D, BNAA06G35460D, BNAA06G36…
GO:0009055	electron carrier activity	545	174	106.32	3.3e-12	2.042e-09	F	BnaA01g25120D, BnaA01g26660D, BnaA01g27870D, BnaA01g35500D, BnaA01g35510D, BnaA02g01990D, BnaA02g02110D, BnaA02g13430D, BnaA02g19890D, BnaA02g22370D, BnaA02g23660D, BnaA02g33490D, BnaA03g03680D, BnaA03g27200D, BnaA03g34060D, BnaA03g34840D, BnaA03g36290D, BnaA03g42050D, BnaA03g59000D, BnaA04g03100D, BnaA04g17290D, BnaA04g28720D, BnaA04g29520D, BnaA05g00170D, BnaA05g00180D, BnaA05g10790D, BnaA05g20…	BNAA01G25120D, BNAA01G26660D, BNAA01G27870D, BNAA01G35500D, BNAA01G35510D, BNAA02G01990D, BNAA02G02110D, BNAA02G13430D, BNAA02G19890D, BNAA02G22370D, BNAA02G23660D, BNAA02G33490D, BNAA03G03680D, BNAA03G27200D, BNAA03G34060D, BNAA03G34840D, BNAA03G36290D, BNAA03G42050D, BNAA03G59000D, BNAA04G03100D, BNAA04G17290D, BNAA04G28720D, BNAA04G29520D, BNAA05G00170D, BNAA05G00180D, BNAA05G10790D, BNAA05G20…
GO:0003677	DNA binding	5677	1280	1107.52	8.7e-10	4.307e-07	F	BnaA01g00290D, BnaA01g00710D, BnaA01g02570D, BnaA01g05150D, BnaA01g06910D, BnaA01g07630D, BnaA01g07650D, BnaA01g08340D, BnaA01g08670D, BnaA01g08830D, BnaA01g09390D, BnaA01g09510D, BnaA01g09650D, BnaA01g09690D, BnaA01g09760D, BnaA01g10110D, BnaA01g10150D, BnaA01g10210D, BnaA01g11280D, BnaA01g11580D, BnaA01g11970D, BnaA01g12710D, BnaA01g13230D, BnaA01g16270D, BnaA01g19720D, BnaA01g21460D, BnaA01g21…	BNAA01G00290D, BNAA01G00710D, BNAA01G02570D, BNAA01G05150D, BNAA01G06910D, BNAA01G07630D, BNAA01G07650D, BNAA01G08340D, BNAA01G08670D, BNAA01G08830D, BNAA01G09390D, BNAA01G09510D, BNAA01G09650D, BNAA01G09690D, BNAA01G09760D, BNAA01G10110D, BNAA01G10150D, BNAA01G10210D, BNAA01G11280D, BNAA01G11580D, BNAA01G11970D, BNAA01G12710D, BNAA01G13230D, BNAA01G16270D, BNAA01G19720D, BNAA01G21460D, BNAA01G21…
GO:0050136	NADH dehydrogenase (quinone) activity	47	25	9.17	2.8e-07	0.0001155	F	BnaA01g34260D, BnaA01g34280D, BnaA02g26170D, BnaAnng22240D, BnaC01g26880D, BnaC01g27930D, BnaC01g27940D, BnaC01g27950D, BnaC02g34290D, BnaC05g37930D, BnaC05g37940D, BnaC05g37950D, BnaC07g21440D, BnaC07g21920D, BnaC09g16420D, BnaC09g26850D, BnaC09g27570D, BnaC09g27580D, BnaC09g29160D, BnaC09g29180D, BnaC09g29190D, BnaC09g29200D, BnaC09g44810D, BnaCnng06230D, BnaUnng00790D	BNAA01G34260D, BNAA01G34280D, BNAA02G26170D, BNAANNG22240D, BNAC01G26880D, BNAC01G27930D, BNAC01G27940D, BNAC01G27950D, BNAC02G34290D, BNAC05G37930D, BNAC05G37940D, BNAC05G37950D, BNAC07G21440D, BNAC07G21920D, BNAC09G16420D, BNAC09G26850D, BNAC09G27570D, BNAC09G27580D, BNAC09G29160D, BNAC09G29180D, BNAC09G29190D, BNAC09G29200D, BNAC09G44810D, BNACNNG06230D, BNAUNNG00790D
GO:0003676	nucleic acid binding	9158	1959	1786.63	3.4e-07	0.0001202	F	BnaA01g00290D, BnaA01g00710D, BnaA01g02140D, BnaA01g02570D, BnaA01g03990D, BnaA01g04230D, BnaA01g05150D, BnaA01g05880D, BnaA01g06560D, BnaA01g06910D, BnaA01g07040D, BnaA01g07630D, BnaA01g07650D, BnaA01g08340D, BnaA01g08670D, BnaA01g08830D, BnaA01g09390D, BnaA01g09510D, BnaA01g09650D, BnaA01g09690D, BnaA01g09760D, BnaA01g10110D, BnaA01g10150D, BnaA01g10210D, BnaA01g10370D, BnaA01g11260D, BnaA01g11…	BNAA01G00290D, BNAA01G00710D, BNAA01G02140D, BNAA01G02570D, BNAA01G03990D, BNAA01G04230D, BNAA01G05150D, BNAA01G05880D, BNAA01G06560D, BNAA01G06910D, BNAA01G07040D, BNAA01G07630D, BNAA01G07650D, BNAA01G08340D, BNAA01G08670D, BNAA01G08830D, BNAA01G09390D, BNAA01G09510D, BNAA01G09650D, BNAA01G09690D, BNAA01G09760D, BNAA01G10110D, BNAA01G10150D, BNAA01G10210D, BNAA01G10370D, BNAA01G11260D, BNAA01G11…
GO:0003954	NADH dehydrogenase activity	48	25	9.36	4.7e-07	0.000132	F	BnaA01g34260D, BnaA01g34280D, BnaA02g26170D, BnaAnng22240D, BnaC01g26880D, BnaC01g27930D, BnaC01g27940D, BnaC01g27950D, BnaC02g34290D, BnaC05g37930D, BnaC05g37940D, BnaC05g37950D, BnaC07g21440D, BnaC07g21920D, BnaC09g16420D, BnaC09g26850D, BnaC09g27570D, BnaC09g27580D, BnaC09g29160D, BnaC09g29180D, BnaC09g29190D, BnaC09g29200D, BnaC09g44810D, BnaCnng06230D, BnaUnng00790D	BNAA01G34260D, BNAA01G34280D, BNAA02G26170D, BNAANNG22240D, BNAC01G26880D, BNAC01G27930D, BNAC01G27940D, BNAC01G27950D, BNAC02G34290D, BNAC05G37930D, BNAC05G37940D, BNAC05G37950D, BNAC07G21440D, BNAC07G21920D, BNAC09G16420D, BNAC09G26850D, BNAC09G27570D, BNAC09G27580D, BNAC09G29160D, BNAC09G29180D, BNAC09G29190D, BNAC09G29200D, BNAC09G44810D, BNACNNG06230D, BNAUNNG00790D
GO:0046983	protein dimerization activity	1549	380	302.19	4.8e-07	0.000132	F	BnaA01g00230D, BnaA01g09760D, BnaA01g12710D, BnaA01g16270D, BnaA01g21210D, BnaA01g25600D, BnaA01g25970D, BnaA01g30140D, BnaA01g35240D, BnaA01g36980D, BnaA02g00140D, BnaA02g02510D, BnaA02g11320D, BnaA02g16230D, BnaA02g19270D, BnaA02g21200D, BnaA02g30070D, BnaA02g30270D, BnaA02g34510D, BnaA02g36990D, BnaA03g05270D, BnaA03g11270D, BnaA03g21570D, BnaA03g27180D, BnaA03g33970D, BnaA03g34470D, BnaA03g47…	BNAA01G00230D, BNAA01G09760D, BNAA01G12710D, BNAA01G16270D, BNAA01G21210D, BNAA01G25600D, BNAA01G25970D, BNAA01G30140D, BNAA01G35240D, BNAA01G36980D, BNAA02G00140D, BNAA02G02510D, BNAA02G11320D, BNAA02G16230D, BNAA02G19270D, BNAA02G21200D, BNAA02G30070D, BNAA02G30270D, BNAA02G34510D, BNAA02G36990D, BNAA03G05270D, BNAA03G11270D, BNAA03G21570D, BNAA03G27180D, BNAA03G33970D, BNAA03G34470D, BNAA03G47…
GO:0008137	NADH dehydrogenase (ubiquinone) activity	44	23	8.58	1.2e-06	0.000297	F	BnaA01g34280D, BnaA02g26170D, BnaAnng22240D, BnaC01g26880D, BnaC01g27930D, BnaC01g27940D, BnaC01g27950D, BnaC02g34290D, BnaC05g37930D, BnaC05g37940D, BnaC05g37950D, BnaC07g21440D, BnaC07g21920D, BnaC09g16420D, BnaC09g26850D, BnaC09g27570D, BnaC09g27580D, BnaC09g29180D, BnaC09g29190D, BnaC09g29200D, BnaC09g44810D, BnaCnng06230D, BnaUnng00790D	BNAA01G34280D, BNAA02G26170D, BNAANNG22240D, BNAC01G26880D, BNAC01G27930D, BNAC01G27940D, BNAC01G27950D, BNAC02G34290D, BNAC05G37930D, BNAC05G37940D, BNAC05G37950D, BNAC07G21440D, BNAC07G21920D, BNAC09G16420D, BNAC09G26850D, BNAC09G27570D, BNAC09G27580D, BNAC09G29180D, BNAC09G29190D, BNAC09G29200D, BNAC09G44810D, BNACNNG06230D, BNAUNNG00790D
GO:0030234	enzyme regulator activity	827	211	161.34	1.3e-05	0.002925	F	BnaA01g14610D, BnaA01g16740D, BnaA01g27310D, BnaA01g27330D, BnaA01g27340D, BnaA01g27350D, BnaA01g30250D, BnaA01g35740D, BnaA02g16230D, BnaA02g25810D, BnaA03g10990D, BnaA03g34440D, BnaA03g34450D, BnaA03g34460D, BnaA03g35120D, BnaA03g36720D, BnaA03g36740D, BnaA03g37600D, BnaA03g42640D, BnaA04g15710D, BnaA04g21520D, BnaA04g26890D, BnaA05g17590D, BnaA05g21620D, BnaA05g22600D, BnaA06g01390D, BnaA06g15…	BNAA01G14610D, BNAA01G16740D, BNAA01G27310D, BNAA01G27330D, BNAA01G27340D, BNAA01G27350D, BNAA01G30250D, BNAA01G35740D, BNAA02G16230D, BNAA02G25810D, BNAA03G10990D, BNAA03G34440D, BNAA03G34450D, BNAA03G34460D, BNAA03G35120D, BNAA03G36720D, BNAA03G36740D, BNAA03G37600D, BNAA03G42640D, BNAA04G15710D, BNAA04G21520D, BNAA04G26890D, BNAA05G17590D, BNAA05G21620D, BNAA05G22600D, BNAA06G01390D, BNAA06G15…

## Sheet: Supplementary Table 4
Supplementary table 4. Gene ontology enrichment analysis of genes with 100% of genomic SNPs transmitted to the transcriptional level in ZY821
GO.ID	Term	Annotated	Count	Expected	P-value	Q-value	Aspect	Gene	Origin input
GO:0009719	response to endogenous stimulus	1753	120	76.47	7.7e-07	0.003026	P	BnaA01g02420D, BnaA01g02430D, BnaA01g05490D, BnaA01g13690D, BnaA01g26500D, BnaA01g27770D, BnaA02g16500D, BnaA02g18200D, BnaA02g32010D, BnaA03g08200D, BnaA03g13450D, BnaA03g15120D, BnaA03g21790D, BnaA03g39450D, BnaA03g45460D, BnaA03g50360D, BnaA03g52470D, BnaA04g06270D, BnaA04g07950D, BnaA04g08940D, BnaA04g14760D, BnaA04g14890D, BnaA04g15450D, BnaA05g22950D, BnaA05g35590D, BnaA06g11350D, BnaA06g23…	BNAA01G02420D, BNAA01G02430D, BNAA01G05490D, BNAA01G13690D, BNAA01G26500D, BNAA01G27770D, BNAA02G16500D, BNAA02G18200D, BNAA02G32010D, BNAA03G08200D, BNAA03G13450D, BNAA03G15120D, BNAA03G21790D, BNAA03G39450D, BNAA03G45460D, BNAA03G50360D, BNAA03G52470D, BNAA04G06270D, BNAA04G07950D, BNAA04G08940D, BNAA04G14760D, BNAA04G14890D, BNAA04G15450D, BNAA05G22950D, BNAA05G35590D, BNAA06G11350D, BNAA06G23…
GO:0009725	response to hormone	1640	113	71.54	1.2e-06	0.003026	P	BnaA01g02420D, BnaA01g02430D, BnaA01g05490D, BnaA01g13690D, BnaA01g26500D, BnaA01g27770D, BnaA02g16500D, BnaA02g18200D, BnaA02g32010D, BnaA03g08200D, BnaA03g13450D, BnaA03g15120D, BnaA03g21790D, BnaA03g45460D, BnaA03g50360D, BnaA03g52470D, BnaA04g06270D, BnaA04g07950D, BnaA04g14760D, BnaA04g14890D, BnaA04g15450D, BnaA05g22950D, BnaA05g35590D, BnaA06g11350D, BnaA06g23830D, BnaA06g24950D, BnaA06g25…	BNAA01G02420D, BNAA01G02430D, BNAA01G05490D, BNAA01G13690D, BNAA01G26500D, BNAA01G27770D, BNAA02G16500D, BNAA02G18200D, BNAA02G32010D, BNAA03G08200D, BNAA03G13450D, BNAA03G15120D, BNAA03G21790D, BNAA03G45460D, BNAA03G50360D, BNAA03G52470D, BNAA04G06270D, BNAA04G07950D, BNAA04G14760D, BNAA04G14890D, BNAA04G15450D, BNAA05G22950D, BNAA05G35590D, BNAA06G11350D, BNAA06G23830D, BNAA06G24950D, BNAA06G25…
GO:0010033	response to organic substance	1974	128	86.11	5.1e-06	0.008575	P	BnaA01g02420D, BnaA01g02430D, BnaA01g05490D, BnaA01g13690D, BnaA01g26500D, BnaA01g27770D, BnaA02g16500D, BnaA02g18200D, BnaA02g32010D, BnaA03g08200D, BnaA03g13450D, BnaA03g15120D, BnaA03g21790D, BnaA03g39450D, BnaA03g45460D, BnaA03g50360D, BnaA03g52470D, BnaA04g06270D, BnaA04g07950D, BnaA04g08940D, BnaA04g14760D, BnaA04g14890D, BnaA04g15450D, BnaA04g16310D, BnaA05g22950D, BnaA05g35590D, BnaA06g11…	BNAA01G02420D, BNAA01G02430D, BNAA01G05490D, BNAA01G13690D, BNAA01G26500D, BNAA01G27770D, BNAA02G16500D, BNAA02G18200D, BNAA02G32010D, BNAA03G08200D, BNAA03G13450D, BNAA03G15120D, BNAA03G21790D, BNAA03G39450D, BNAA03G45460D, BNAA03G50360D, BNAA03G52470D, BNAA04G06270D, BNAA04G07950D, BNAA04G08940D, BNAA04G14760D, BNAA04G14890D, BNAA04G15450D, BNAA04G16310D, BNAA05G22950D, BNAA05G35590D, BNAA06G11…

## Sheet: Supplementary Table 5
Supplementary table 5. Gene ontology enrichment analysis of genes with 100% of genomic SNPs transmitted to the transcriptional level in ZS11
GO.ID	Term	Annotated	Count	Expected	P-value	Q-value	Aspect	Gene	Origin input
GO:1901700	response to oxygen-containing compound	1415	206	139.04	5.5e-09	2.774e-05	P	BnaA01g01040D, BnaA01g02030D, BnaA01g05490D, BnaA01g08170D, BnaA01g10580D, BnaA01g19460D, BnaA01g26720D, BnaA01g26980D, BnaA02g01140D, BnaA02g06910D, BnaA02g10650D, BnaA02g12360D, BnaA02g12850D, BnaA02g14430D, BnaA02g17670D, BnaA02g30460D, BnaA02g32010D, BnaA03g00260D, BnaA03g01570D, BnaA03g04480D, BnaA03g05370D, BnaA03g08050D, BnaA03g09300D, BnaA03g12660D, BnaA03g15120D, BnaA03g17870D, BnaA03g20…	BNAA01G01040D, BNAA01G02030D, BNAA01G05490D, BNAA01G08170D, BNAA01G10580D, BNAA01G19460D, BNAA01G26720D, BNAA01G26980D, BNAA02G01140D, BNAA02G06910D, BNAA02G10650D, BNAA02G12360D, BNAA02G12850D, BNAA02G14430D, BNAA02G17670D, BNAA02G30460D, BNAA02G32010D, BNAA03G00260D, BNAA03G01570D, BNAA03G04480D, BNAA03G05370D, BNAA03G08050D, BNAA03G09300D, BNAA03G12660D, BNAA03G15120D, BNAA03G17870D, BNAA03G20…
GO:0010033	response to organic substance	1974	259	193.96	7.4e-07	0.001866	P	BnaA01g00580D, BnaA01g01040D, BnaA01g02030D, BnaA01g02390D, BnaA01g05190D, BnaA01g05490D, BnaA01g08170D, BnaA01g10580D, BnaA01g19460D, BnaA01g23940D, BnaA01g26720D, BnaA01g26980D, BnaA01g33420D, BnaA02g00790D, BnaA02g08100D, BnaA02g10650D, BnaA02g12360D, BnaA02g12850D, BnaA02g17670D, BnaA02g18200D, BnaA02g30460D, BnaA02g32010D, BnaA02g34880D, BnaA02g35780D, BnaA03g00260D, BnaA03g01570D, BnaA03g05…	BNAA01G00580D, BNAA01G01040D, BNAA01G02030D, BNAA01G02390D, BNAA01G05190D, BNAA01G05490D, BNAA01G08170D, BNAA01G10580D, BNAA01G19460D, BNAA01G23940D, BNAA01G26720D, BNAA01G26980D, BNAA01G33420D, BNAA02G00790D, BNAA02G08100D, BNAA02G10650D, BNAA02G12360D, BNAA02G12850D, BNAA02G17670D, BNAA02G18200D, BNAA02G30460D, BNAA02G32010D, BNAA02G34880D, BNAA02G35780D, BNAA03G00260D, BNAA03G01570D, BNAA03G05…
GO:0009628	response to abiotic stimulus	1831	240	179.91	2e-06	0.002774	P	BnaA01g02900D, BnaA01g05490D, BnaA01g10580D, BnaA01g26720D, BnaA02g00310D, BnaA02g00740D, BnaA02g01140D, BnaA02g06910D, BnaA02g08140D, BnaA02g09950D, BnaA02g12820D, BnaA02g14430D, BnaA02g15350D, BnaA02g16060D, BnaA02g29010D, BnaA02g30460D, BnaA02g32010D, BnaA02g34880D, BnaA03g00260D, BnaA03g04480D, BnaA03g05200D, BnaA03g05370D, BnaA03g07740D, BnaA03g08050D, BnaA03g09300D, BnaA03g12660D, BnaA03g12…	BNAA01G02900D, BNAA01G05490D, BNAA01G10580D, BNAA01G26720D, BNAA02G00310D, BNAA02G00740D, BNAA02G01140D, BNAA02G06910D, BNAA02G08140D, BNAA02G09950D, BNAA02G12820D, BNAA02G14430D, BNAA02G15350D, BNAA02G16060D, BNAA02G29010D, BNAA02G30460D, BNAA02G32010D, BNAA02G34880D, BNAA03G00260D, BNAA03G04480D, BNAA03G05200D, BNAA03G05370D, BNAA03G07740D, BNAA03G08050D, BNAA03G09300D, BNAA03G12660D, BNAA03G12…
GO:0009719	response to endogenous stimulus	1753	231	172.25	2.2e-06	0.002774	P	BnaA01g00580D, BnaA01g01040D, BnaA01g02030D, BnaA01g02390D, BnaA01g05190D, BnaA01g05490D, BnaA01g08170D, BnaA01g10580D, BnaA01g19460D, BnaA01g23940D, BnaA01g26720D, BnaA01g26980D, BnaA01g33420D, BnaA02g00790D, BnaA02g08100D, BnaA02g10650D, BnaA02g12360D, BnaA02g12850D, BnaA02g18200D, BnaA02g30460D, BnaA02g32010D, BnaA02g34880D, BnaA02g35780D, BnaA03g00260D, BnaA03g01570D, BnaA03g05370D, BnaA03g06…	BNAA01G00580D, BNAA01G01040D, BNAA01G02030D, BNAA01G02390D, BNAA01G05190D, BNAA01G05490D, BNAA01G08170D, BNAA01G10580D, BNAA01G19460D, BNAA01G23940D, BNAA01G26720D, BNAA01G26980D, BNAA01G33420D, BNAA02G00790D, BNAA02G08100D, BNAA02G10650D, BNAA02G12360D, BNAA02G12850D, BNAA02G18200D, BNAA02G30460D, BNAA02G32010D, BNAA02G34880D, BNAA02G35780D, BNAA03G00260D, BNAA03G01570D, BNAA03G05370D, BNAA03G06…
GO:0009739	response to gibberellin	112	28	11	2.8e-06	0.002774	P	BnaA01g02030D, BnaA02g10650D, BnaA02g12850D, BnaA03g05370D, BnaA03g17870D, BnaA03g27440D, BnaA03g45710D, BnaA05g09520D, BnaA06g27290D, BnaA06g37640D, BnaA07g11930D, BnaA07g12290D, BnaA07g13130D, BnaA08g20030D, BnaA08g22580D, BnaA10g21200D, BnaA10g28420D, BnaAnng01790D, BnaAnng35540D, BnaAnng38140D, BnaC01g12750D, BnaC02g18090D, BnaC03g03210D, BnaC03g16290D, BnaC06g28190D, BnaC06g35530D, BnaCnng16…	BNAA01G02030D, BNAA02G10650D, BNAA02G12850D, BNAA03G05370D, BNAA03G17870D, BNAA03G27440D, BNAA03G45710D, BNAA05G09520D, BNAA06G27290D, BNAA06G37640D, BNAA07G11930D, BNAA07G12290D, BNAA07G13130D, BNAA08G20030D, BNAA08G22580D, BNAA10G21200D, BNAA10G28420D, BNAANNG01790D, BNAANNG35540D, BNAANNG38140D, BNAC01G12750D, BNAC02G18090D, BNAC03G03210D, BNAC03G16290D, BNAC06G28190D, BNAC06G35530D, BNACNNG16…
GO:0042221	response to chemical	2918	359	286.72	3.3e-06	0.002774	P	BnaA01g00580D, BnaA01g01040D, BnaA01g02030D, BnaA01g02390D, BnaA01g03860D, BnaA01g05190D, BnaA01g05490D, BnaA01g07620D, BnaA01g08170D, BnaA01g10580D, BnaA01g10800D, BnaA01g12840D, BnaA01g19460D, BnaA01g23940D, BnaA01g26720D, BnaA01g26980D, BnaA01g33420D, BnaA02g00790D, BnaA02g01140D, BnaA02g01150D, BnaA02g06910D, BnaA02g08100D, BnaA02g10650D, BnaA02g11060D, BnaA02g12330D, BnaA02g12360D, BnaA02g12…	BNAA01G00580D, BNAA01G01040D, BNAA01G02030D, BNAA01G02390D, BNAA01G03860D, BNAA01G05190D, BNAA01G05490D, BNAA01G07620D, BNAA01G08170D, BNAA01G10580D, BNAA01G10800D, BNAA01G12840D, BNAA01G19460D, BNAA01G23940D, BNAA01G26720D, BNAA01G26980D, BNAA01G33420D, BNAA02G00790D, BNAA02G01140D, BNAA02G01150D, BNAA02G06910D, BNAA02G08100D, BNAA02G10650D, BNAA02G11060D, BNAA02G12330D, BNAA02G12360D, BNAA02G12…
GO:0001101	response to acid chemical	1039	147	102.09	4.2e-06	0.003026	P	BnaA01g02030D, BnaA01g10580D, BnaA01g19460D, BnaA01g26720D, BnaA01g26980D, BnaA02g01140D, BnaA02g06910D, BnaA02g10650D, BnaA02g12850D, BnaA02g14430D, BnaA02g17670D, BnaA02g30460D, BnaA02g32010D, BnaA03g04480D, BnaA03g05370D, BnaA03g08050D, BnaA03g12660D, BnaA03g15120D, BnaA03g17870D, BnaA03g20470D, BnaA03g27440D, BnaA03g33200D, BnaA03g34320D, BnaA03g36840D, BnaA03g40370D, BnaA03g44820D, BnaA03g45…	BNAA01G02030D, BNAA01G10580D, BNAA01G19460D, BNAA01G26720D, BNAA01G26980D, BNAA02G01140D, BNAA02G06910D, BNAA02G10650D, BNAA02G12850D, BNAA02G14430D, BNAA02G17670D, BNAA02G30460D, BNAA02G32010D, BNAA03G04480D, BNAA03G05370D, BNAA03G08050D, BNAA03G12660D, BNAA03G15120D, BNAA03G17870D, BNAA03G20470D, BNAA03G27440D, BNAA03G33200D, BNAA03G34320D, BNAA03G36840D, BNAA03G40370D, BNAA03G44820D, BNAA03G45…
GO:0009725	response to hormone	1640	214	161.14	9.8e-06	0.006179	P	BnaA01g00580D, BnaA01g01040D, BnaA01g02030D, BnaA01g02390D, BnaA01g05190D, BnaA01g05490D, BnaA01g08170D, BnaA01g10580D, BnaA01g19460D, BnaA01g23940D, BnaA01g26720D, BnaA01g26980D, BnaA01g33420D, BnaA02g00790D, BnaA02g08100D, BnaA02g10650D, BnaA02g12850D, BnaA02g18200D, BnaA02g30460D, BnaA02g32010D, BnaA02g34880D, BnaA02g35780D, BnaA03g00260D, BnaA03g01570D, BnaA03g05370D, BnaA03g06880D, BnaA03g08…	BNAA01G00580D, BNAA01G01040D, BNAA01G02030D, BNAA01G02390D, BNAA01G05190D, BNAA01G05490D, BNAA01G08170D, BNAA01G10580D, BNAA01G19460D, BNAA01G23940D, BNAA01G26720D, BNAA01G26980D, BNAA01G33420D, BNAA02G00790D, BNAA02G08100D, BNAA02G10650D, BNAA02G12850D, BNAA02G18200D, BNAA02G30460D, BNAA02G32010D, BNAA02G34880D, BNAA02G35780D, BNAA03G00260D, BNAA03G01570D, BNAA03G05370D, BNAA03G06880D, BNAA03G08…
GO:0000785	chromatin	238	46	24.37	1.8e-05	0.007964	C	BnaA01g27090D, BnaA02g00780D, BnaA02g06910D, BnaA02g17330D, BnaA02g31240D, BnaA03g14070D, BnaA03g21740D, BnaA04g04590D, BnaA04g16620D, BnaA04g19330D, BnaA04g27780D, BnaA05g20240D, BnaA05g35660D, BnaA06g04180D, BnaA06g04640D, BnaA06g34780D, BnaA06g37640D, BnaA07g16430D, BnaA07g21610D, BnaA09g16040D, BnaA09g53380D, BnaA10g08450D, BnaA10g21880D, BnaA10g22690D, BnaA10g22710D, BnaAnng15490D, BnaC01g00…	BNAA01G27090D, BNAA02G00780D, BNAA02G06910D, BNAA02G17330D, BNAA02G31240D, BNAA03G14070D, BNAA03G21740D, BNAA04G04590D, BNAA04G16620D, BNAA04G19330D, BNAA04G27780D, BNAA05G20240D, BNAA05G35660D, BNAA06G04180D, BNAA06G04640D, BNAA06G34780D, BNAA06G37640D, BNAA07G16430D, BNAA07G21610D, BNAA09G16040D, BNAA09G53380D, BNAA10G08450D, BNAA10G21880D, BNAA10G22690D, BNAA10G22710D, BNAANNG15490D, BNAC01G00…
GO:0000786	nucleosome	199	40	20.38	2.4e-05	0.007964	C	BnaA01g27090D, BnaA02g00780D, BnaA02g06910D, BnaA02g17330D, BnaA02g31240D, BnaA03g14070D, BnaA04g04590D, BnaA04g16620D, BnaA04g27780D, BnaA05g20240D, BnaA05g35660D, BnaA06g04180D, BnaA06g04640D, BnaA06g34780D, BnaA06g37640D, BnaA07g16430D, BnaA07g21610D, BnaA09g53380D, BnaA10g08450D, BnaA10g21880D, BnaA10g22690D, BnaA10g22710D, BnaAnng15490D, BnaC01g00910D, BnaC01g35960D, BnaC03g04590D, BnaC03g68…	BNAA01G27090D, BNAA02G00780D, BNAA02G06910D, BNAA02G17330D, BNAA02G31240D, BNAA03G14070D, BNAA04G04590D, BNAA04G16620D, BNAA04G27780D, BNAA05G20240D, BNAA05G35660D, BNAA06G04180D, BNAA06G04640D, BNAA06G34780D, BNAA06G37640D, BNAA07G16430D, BNAA07G21610D, BNAA09G53380D, BNAA10G08450D, BNAA10G21880D, BNAA10G22690D, BNAA10G22710D, BNAANNG15490D, BNAC01G00910D, BNAC01G35960D, BNAC03G04590D, BNAC03G68…
GO:0044815	DNA packaging complex	204	40	20.89	4.4e-05	0.007964	C	BnaA01g27090D, BnaA02g00780D, BnaA02g06910D, BnaA02g17330D, BnaA02g31240D, BnaA03g14070D, BnaA04g04590D, BnaA04g16620D, BnaA04g27780D, BnaA05g20240D, BnaA05g35660D, BnaA06g04180D, BnaA06g04640D, BnaA06g34780D, BnaA06g37640D, BnaA07g16430D, BnaA07g21610D, BnaA09g53380D, BnaA10g08450D, BnaA10g21880D, BnaA10g22690D, BnaA10g22710D, BnaAnng15490D, BnaC01g00910D, BnaC01g35960D, BnaC03g04590D, BnaC03g68…	BNAA01G27090D, BNAA02G00780D, BNAA02G06910D, BNAA02G17330D, BNAA02G31240D, BNAA03G14070D, BNAA04G04590D, BNAA04G16620D, BNAA04G27780D, BNAA05G20240D, BNAA05G35660D, BNAA06G04180D, BNAA06G04640D, BNAA06G34780D, BNAA06G37640D, BNAA07G16430D, BNAA07G21610D, BNAA09G53380D, BNAA10G08450D, BNAA10G21880D, BNAA10G22690D, BNAA10G22710D, BNAANNG15490D, BNAC01G00910D, BNAC01G35960D, BNAC03G04590D, BNAC03G68…
GO:0032993	protein-DNA complex	211	41	21.61	4.4e-05	0.007964	C	BnaA01g27090D, BnaA02g00780D, BnaA02g06910D, BnaA02g17330D, BnaA02g31240D, BnaA03g14070D, BnaA04g04590D, BnaA04g16620D, BnaA04g27780D, BnaA05g20240D, BnaA05g35660D, BnaA06g04180D, BnaA06g04640D, BnaA06g34780D, BnaA06g37640D, BnaA07g16430D, BnaA07g21610D, BnaA09g53380D, BnaA10g08450D, BnaA10g21880D, BnaA10g22690D, BnaA10g22710D, BnaAnng15490D, BnaC01g00910D, BnaC01g35960D, BnaC03g04590D, BnaC03g47…	BNAA01G27090D, BNAA02G00780D, BNAA02G06910D, BNAA02G17330D, BNAA02G31240D, BNAA03G14070D, BNAA04G04590D, BNAA04G16620D, BNAA04G27780D, BNAA05G20240D, BNAA05G35660D, BNAA06G04180D, BNAA06G04640D, BNAA06G34780D, BNAA06G37640D, BNAA07G16430D, BNAA07G21610D, BNAA09G53380D, BNAA10G08450D, BNAA10G21880D, BNAA10G22690D, BNAA10G22710D, BNAANNG15490D, BNAC01G00910D, BNAC01G35960D, BNAC03G04590D, BNAC03G47…
GO:0003700	transcription factor activity, sequence-specific DNA binding	1800	240	174.27	2.1e-07	0.0002723	F	BnaA01g01040D, BnaA01g01370D, BnaA01g02030D, BnaA01g02720D, BnaA01g02900D, BnaA01g04050D, BnaA01g04150D, BnaA01g13920D, BnaA01g15570D, BnaA01g16910D, BnaA01g23940D, BnaA01g32740D, BnaA01g34730D, BnaA02g00310D, BnaA02g00350D, BnaA02g01080D, BnaA02g10340D, BnaA02g10650D, BnaA02g13950D, BnaA02g14040D, BnaA02g14100D, BnaA02g14430D, BnaA02g14550D, BnaA02g15420D, BnaA02g17180D, BnaA02g18720D, BnaA02g20…	BNAA01G01040D, BNAA01G01370D, BNAA01G02030D, BNAA01G02720D, BNAA01G02900D, BNAA01G04050D, BNAA01G04150D, BNAA01G13920D, BNAA01G15570D, BNAA01G16910D, BNAA01G23940D, BNAA01G32740D, BNAA01G34730D, BNAA02G00310D, BNAA02G00350D, BNAA02G01080D, BNAA02G10340D, BNAA02G10650D, BNAA02G13950D, BNAA02G14040D, BNAA02G14100D, BNAA02G14430D, BNAA02G14550D, BNAA02G15420D, BNAA02G17180D, BNAA02G18720D, BNAA02G20…
GO:0001071	nucleic acid binding transcription factor activity	1801	240	174.37	2.2e-07	0.0002723	F	BnaA01g01040D, BnaA01g01370D, BnaA01g02030D, BnaA01g02720D, BnaA01g02900D, BnaA01g04050D, BnaA01g04150D, BnaA01g13920D, BnaA01g15570D, BnaA01g16910D, BnaA01g23940D, BnaA01g32740D, BnaA01g34730D, BnaA02g00310D, BnaA02g00350D, BnaA02g01080D, BnaA02g10340D, BnaA02g10650D, BnaA02g13950D, BnaA02g14040D, BnaA02g14100D, BnaA02g14430D, BnaA02g14550D, BnaA02g15420D, BnaA02g17180D, BnaA02g18720D, BnaA02g20…	BNAA01G01040D, BNAA01G01370D, BNAA01G02030D, BNAA01G02720D, BNAA01G02900D, BNAA01G04050D, BNAA01G04150D, BNAA01G13920D, BNAA01G15570D, BNAA01G16910D, BNAA01G23940D, BNAA01G32740D, BNAA01G34730D, BNAA02G00310D, BNAA02G00350D, BNAA02G01080D, BNAA02G10340D, BNAA02G10650D, BNAA02G13950D, BNAA02G14040D, BNAA02G14100D, BNAA02G14430D, BNAA02G14550D, BNAA02G15420D, BNAA02G17180D, BNAA02G18720D, BNAA02G20…
